1 **Musashi-2 causes cardiac hypertrophy and heart failure by inducing mitochondrial dysfunction**  
2 **through destabilizing *Cluh* and *Smyd1* mRNA**

3 Sandhya Singh<sup>1</sup>, Aakash Gaur<sup>1,2</sup>, Renu Kumari<sup>1,2</sup>, Shakti Prakash<sup>1,2</sup>, Sunaina Kumari<sup>1</sup>, Ayushi  
4 Devendrasingh Chaudhary<sup>1,2</sup>, Rakesh Kumar Sharma<sup>2,3</sup>, Pankaj Prasun<sup>1</sup>, Priyanka Pant<sup>4,2</sup>, Thomas  
5 Thum<sup>5,6</sup>, Kumaravelu Jagavelu<sup>1,2</sup>, Pragya Bharati<sup>1,2</sup>, Kashif Hanif<sup>1,2</sup>, Pragya Chitkara<sup>7</sup>, Shailesh Kumar<sup>7</sup>,  
6 Kalyan Mitra<sup>2,3</sup>, Shashi Kumar Gupta<sup>1,2\*</sup>

7 <sup>1</sup>Pharmacology Division, CSIR-Central Drug Research Institute, Lucknow, India

8 <sup>2</sup>Academy of Scientific and Innovative Research (AcSIR), Ghaziabad, India

9 <sup>3</sup>Division of Sophisticated Analytical Instrument Facility and Research, CSIR-Central Drug Research  
10 Institute, Lucknow, India

11 <sup>4</sup>CSIR-Centre for Cellular and Molecular Biology, Hyderabad, India

12 <sup>5</sup>Institute of Molecular and Translational Therapeutic Strategies, Hannover Medical School, Hannover  
13 Germany

14 <sup>6</sup>Fraunhofer Institute of Toxicology and Experimental Medicine, Hannover, Germany

15 <sup>7</sup>National Institute of Plant Genome Research, New Delhi, India

16 **Short title:** *Msi2* induces heart-failure

17 \*Correspondence Address:

18 Shashi Kumar Gupta, PhD

19 Pharmacology Division CSIR-CDRI, Sector 10,

20 Jankipuram Extension, Lucknow, India 226031

21 Email: [shashik.gupta1@cdri.res.in](mailto:shashik.gupta1@cdri.res.in)

22 Phone: +915222772450, Fax: +915222771941

23 **Word Count:** 9039

24

25

26

27

28

29

30

31

32

33

34

1 **Abstract**

2 Regulation of RNA stability and translation by RNA-binding proteins (RBPs) is a crucial process altering  
3 gene expression. Musashi family of RBPs comprising *Msi1* and *Msi2* are known to control RNA stability  
4 and translation. However, despite the presence of MSI2 in the heart, its function remains entirely  
5 unknown. Here, we aim to explore the cardiac functions of MSI2. We confirmed the presence of MSI2 in  
6 the adult mouse, rat heart, and neonatal rat cardiomyocytes. Furthermore, *Msi2* was significantly enriched  
7 in the heart's cardiomyocyte fraction. Next, using RNA-seq data and isoform-specific PCR primers, we  
8 identified, *Msi2* isoforms 1, 4, and 5 and two novel putative isoforms labeled as *Msi2* isoforms 6 and 7 to  
9 be expressed in the heart. Overexpression of *Msi2* isoforms led to cardiac hypertrophy in cultured  
10 cardiomyocytes. Additionally, *Msi2* was also found to be significantly increased in a pressure-overload  
11 model of cardiac hypertrophy. To validate the hypertrophic effects, we selected isoforms 4 and 7 due to  
12 their unique alternative splicing patterns. AAV9-mediated overexpression of *Msi2* isoforms 4 and 7 in  
13 murine hearts led to cardiac hypertrophy, dilation, heart failure, and eventually early death, confirming a  
14 pathological function for *Msi2*. Using global proteomics, gene ontology, transmission electron  
15 microscopy, and transmembrane potential measurement assays increased MSI2 was found to cause  
16 mitochondrial dysfunction in the heart. Mechanistically, we identified *Cluh* and *Smyd1* as direct  
17 downstream targets of *Msi2*. Overexpression of *Cluh* or *Smyd1* inhibited *Msi2*-induced hypertrophy and  
18 mitochondrial dysfunction in cardiomyocytes. Collectively, we show that *Msi2* induces hypertrophy,  
19 mitochondrial dysfunction, and heart failure.

20

21 **Keywords:** RNA-binding protein, MSI2, cardiac hypertrophy, heart failure, mitochondrial dysfunction

22

23

24

25

26

27

28

29

30

31

32

33

34

1 **Non-standard Abbreviations and Acronyms**

2 **RBP** - RNA-binding protein

3 **AAV** – Adeno-associated virus

4 **GFP** – Green fluorescent protein

5 **UTR** – Untranslated region

6 **DNA** – Deoxyribonucleic acid

7 **RNA** – Ribonucleic acid

8 **rRNA** – Ribosomal RNA

9 **tRNA** – Transfer RNA

10 **mRNA** – messenger RNA

11 **NCBI** – National Center for Biotechnology Information

12 **PCR** – Polymerase chain reaction

13 **DAPI** - 4',6-diamidino-2-phenylindole

14 **TEM** – Transmission Electron Microscope

15 **RRM** – RNA recognition motifs

16 **LC-MS/MS** - Liquid Chromatography with tandem mass spectrometry

17 **GO** – Gene Ontology

18 **TCA** – Tricarboxylic Acid

19 **ARE** - Adenylate-uridylate-rich elements

20 **TMRE** – Tetramethylrhodamine, ethyl ester

21 **TAC** – Trans-aortic constriction

22 **FPKM** – Fragment per kilobase of transcript per million read pairs

23 **MOI** – Multiplicity of Infection

24

25

26

27

28

29

30

31

32

33

34

## 1 **Introduction**

2 Despite the availability of heart failure therapies, point-of-care, and our increasing understanding of  
3 disease mechanisms, cardiovascular diseases are still globally the leading cause of mortality [23]. Heart  
4 failure is the eventual end-point of all cardiovascular diseases leading to more than eighteen million  
5 deaths in 2019 around the globe [23]. Therefore, there is an unmet need to understand the  
6 pathophysiology of cardiovascular diseases better and identify novel druggable targets which would  
7 reduce the mortality burden. One key feature of the failing heart is energy deprivation due to  
8 abnormalities in mitochondrial structure, dynamics, and function [25]. Mitochondria is a semi-  
9 autonomous body with genome-encoding proteins, rRNAs, and tRNAs [28]. Besides the mitochondrial  
10 genome, nucleus-encoded regulatory factors regulate mitochondrial biogenesis, quality, and function [28].  
11 These nucleus-encoded regulatory factors regulate the transcription, processing, and translation of  
12 mitochondrial genes and several other nuclear genes involved in the mitochondrial function directly or  
13 indirectly [28]. Alteration in these broad regulators affects the mitochondrial structure and function by  
14 altering the downstream gene expression.

15 Transcriptional or post-transcriptional processes are involved in gene expression regulation [6]. Post-  
16 transcriptional regulation of gene expression is mainly through RNA [6]. RNA-binding proteins (RBPs)  
17 are one of the primary mediators of post-transcriptional gene expression regulation by their RNA-binding  
18 function [6]. Humans and mice have over a thousand RBPs that bind to RNAs by canonical or non-  
19 canonical RNA-binding domains [13]. However, detailed studies describing the cardiovascular role of  
20 RBPs are scanty. RBPs regulate all critical steps during the life cycle of RNA, soon after its transcription  
21 until its decay [6]. RBPs regulate 5' capping, splicing, 3' polyadenylation, export, translation, decay, and  
22 stability of RNA molecules [6]. RNA stability and decay are crucial for cellular homeostasis, and its  
23 misregulation may lead to cardiovascular diseases [32]. Several RBPs promote the stability and decay of  
24 RNAs like PAIP2, YTHDF1-3, HuR, AUF1, TTP, KSRP, and MSI1-2 [31, 32] [15].

25 Musashi (MSI) family of RBPs is characterized by the presence of tandem RNA recognition motifs  
26 (RRM). Musashi was first identified as a regulator of adult sensory organ development in *Drosophila*  
27 [19]. In mammals, two Musashi isoforms, *MSI1* and *MSI2*, are found and have similar RNA binding  
28 specificities [15]. The function of MSI varies from translation inhibition or initiation to polyadenylation,  
29 alternative splicing, and mRNA stabilization or decay [15]. Musashi proteins regulate the self-renewal  
30 potential of hematopoietic stem cells and crypt base columnar stem cells in the intestine [15].  
31 Furthermore, they also promote hematopoietic malignancies and colorectal carcinomas [15]. Additionally,  
32 *Msi2* regulates the mitochondrial distribution of microRNA miR-301a-3p in endothelial cells [11].

33 Recently, two contradictory reports have been published regarding *MSI2* function in the skeletal muscle.  
34 Increased *MSI2* levels were found to be responsible for muscle wasting and atrophy in myotonic

1 dystrophy type 1 [24]. On the contrary, Wang et al. show upregulation of MSI2 promote skeletal muscle  
2 differentiation, and MSI2 KO mice show defective muscle regeneration [34]. Mechanistically, both  
3 studies report repression of miR-7a processing by MSI2 as the downstream mechanism warranting further  
4 investigations. In mice, *Msi1* was primarily expressed in the brain, small intestine, and ovary while absent  
5 in the heart [26]. On the contrary, *Msi2* showed more ubiquitous expression and was expressed in the  
6 heart [27]. Despite the expression of MSI2 in the heart, its role remains largely unknown. Here, we aim to  
7 study the cardiac function of MSI2.

8 Here, we report a pro-hypertrophic role for MSI2 in cardiomyocytes leading to heart failure and death in  
9 mice. AAV9 (Adeno-associated virus serotype 9) mediated overexpression of *Msi2* promoted degradation  
10 of *Cluh* and *Smyd1* and thus led to mitochondrial dysfunction. Overexpression of *Cluh* or *Smyd1* inhibits  
11 the pro-hypertrophic and mitochondrial dysfunction induced by *Msi2*.

12

## 13 **Methods**

### 14 **Cell culture and lentivirus**

15 Human cardiomyocyte cell line AC16 was cultured in DMEM/F-12 medium (Thermo Scientific, USA)  
16 together with 12.5% fetal bovine serum (Thermo Scientific, USA), penicillin and streptomycin (Thermo  
17 Scientific, USA), and 15 mM HEPES at 37°C in the presence of 5% CO<sub>2</sub>. Permanent AC16 cell lines  
18 were made by lentiviral-mediated transduction and puromycin selection. Lentiviruses were produced by  
19 transfection of HEK293T cells with lenti-plasmid, psPAX2, and pMD2.G using PEI Max 40000  
20 (PolySciences, USA). The supernatant containing lentiviral particles was harvested and mixed with forty  
21 percent PEG 8000 (Sigma Aldrich, USA) and incubated for four hours at 4°C with 60 rpm rotation.  
22 Precipitated lentiviral particles were resuspended in 1X PBS. HEK293T cells were cultured in DMEM  
23 high glucose medium with 10% fetal bovine serum (Thermo Scientific, USA), penicillin and streptomycin  
24 (Thermo Scientific, USA).

### 25 **Neonatal rat cardiomyocytes**

26 One to three-day-old SD rat neonates were used to isolate primary cardiomyocytes. Hearts were explanted  
27 and digested with Collagenase Type II at 1mg/ml (Thermo Scientific, USA) at 37°C. Digested cells were  
28 pellet down and resuspended in DMEM with 20% fetal bovine serum and penicillin/streptomycin.  
29 Resuspended cells were then plated in 10 cm dishes and incubated inside a cell culture incubator  
30 (Eppendorf, Germany) at 37°C with 5% CO<sub>2</sub> for ninety minutes. Non-adherent cells were collected, and  
31 cardiomyocytes were counted. Counted cardiomyocytes were seeded in gelatin-coated cell culture plates  
32 with DMEM and 20% fetal bovine serum and kept inside the cell culture incubator. Forty-eight hours  
33 later, cells were washed with PBS, and a fresh DMEM medium with 1% fetal bovine serum was added.  
34 Cardiomyocytes were transduced with AAV6 at MOI of 0.1-1\*10<sup>5</sup> and cultured for four to five days. To

1 measure mitochondrial transmembrane potential, we treated transduced cardiomyocytes with 100nM  
2 TMRE-Red (Thermo Scientific, USA). After thirty minutes of treatment, imaging was done using Leica  
3 DMI 6000 B (Leica Microsystems, USA) at 20X objective. Red fluorescence intensity was calculated  
4 with Image J. For isoproterenol treatment, cardiomyocytes were treated with 20 $\mu$ M isoproterenol  
5 hydrochloride (Sigma-Aldrich) for seventy-two hours. All the experiments were performed three  
6 independent times (biological replicate) with three replicates per group (technical replicate). For  
7 actinomycin D treatment, cardiomyocytes were treated at a dose of 5 $\mu$ g/ml after sixty hours of AAV6  
8 transduction. Cells were collected at zero, four, and six hours post-treatment.

### 9 **Adeno-associated virus (AAV)**

10 All the *Msi2* isoforms cDNA were cloned in AAV-CMV plasmid. Adeno-associated viruses were  
11 produced according to a previously published protocol [17]. In brief, HEK293T cells were transfected  
12 with AAV plasmid and helper plasmid using PEI Max 40000 (PolySciences, USA). Twenty-four hours  
13 later, the transfection medium was removed, and fresh DMEM (Thermo Scientific, USA) with 1% fetal  
14 bovine serum (Thermo Scientific, USA), penicillin/streptomycin (Thermo Scientific, USA), 10mM  
15 HEPES (Sigma Aldrich, USA), 0.075% NaHCO<sub>3</sub> and 1X Glutamax (Thermo Scientific, USA). Cells  
16 were incubated for forty-eight hours, a culture medium containing AAV particles was harvested, and a  
17 fresh production medium was added. Once again, forty-eight hours later, culture medium with viral  
18 particles was harvested. HEK293T cells containing AAV viral particles were collected and lysed with  
19 citrate buffer. Medium with viral particles and cell lysate was mixed with 40% PEG 8000 and incubated  
20 overnight at 4°C. The next day precipitated viral particles were harvested by centrifugation and  
21 resuspended in PBS. AAV viral particles were then cleaned by chloroform and used for *in vitro*  
22 applications. For *in vivo* use, chloroform-cleaned viruses were loaded on Optiprep (Sigma Aldrich,  
23 USA) density gradient and ultracentrifuged (Beckman Coulter, USA). AAV viral particles were then  
24 collected from 40% gradient by puncturing the ultracentrifuge tube. The collected viral particles were  
25 then cleaned and concentrated using Amicon 100K (100kDa) cut-off columns (Sigma Aldrich, USA).  
26 AAV-GFP was used as a control.

### 27 **RNA and PCR**

28 Total RNA from cell culture or heart tissue was isolated using RNA iso (Takara Bio, Japan) per the  
29 manufacturer's protocol. A total of 1-2  $\mu$ g RNA was reverse transcribed with random hexamers using  
30 PrimeScript 1<sup>st</sup> strand cDNA synthesis kit (Takara Bio, Japan) per the manufacturer's protocol on Verti 96  
31 well thermocycler (Thermo Scientific, USA). Real-time quantitative PCR of mRNA was performed using  
32 TB Green Premix Extaq (Takara Bio) as per the manufacturer's protocol on Quant Studio 12K Flex  
33 (Thermo Scientific, USA) using specific primers listed in **Supplementary Table 1**. For isoform  
34 detection, cDNA was amplified using Emerald Amp GT PCR mix (Takara Bio, Japan) on Verti 96 well

1 thermocycler (Thermo Scientific, USA) by primer pair - forward primer 5'  
2 CTACCCCAACTTTGTGGCAAC 3' reverse primer 5' GCCTGGACATCCAGGTATGC 3'. All the  
3 primers were synthesized from Sigma-Aldrich. Barcode Biosciences, Bangalore, India, did DNA  
4 sequencing.

#### 5 **Western Blotting**

6 Cell pellets were lysed in 1X RIPA lysis buffer and sonicated. A small piece was crushed in 1X RIPA  
7 buffer for heart tissue with liquid N<sub>2</sub>. Protein quantification of isolated lysates was done using a BCA kit  
8 (Thermo Scientific, USA). Twenty-five to forty micrograms of lysate were loaded on 12% SDS-PAGE  
9 gel to resolve the proteins. Resolved proteins were transferred to the PVDF membrane (BioRad, USA)  
10 using a Mini PROTEAN Tetra cell (Biorad, USA). The membrane was then incubated with specific  
11 antibodies for detection of MSI2 (#PA5-31024 Thermo Scientific, USA), GAPDH (#MA515738 Thermo  
12 Scientific, USA), and ACTB (#A00730-100 Genescript, USA). Secondary antibodies linked to HRP  
13 (Thermo Scientific, USA) were used for detection. Precision Plus Protein Western C ladder (BioRad) and  
14 Precision protein Streptactin-HRP conjugate (BioRad) were used to determine protein size on the  
15 membrane.

#### 16 **Luciferase reporter assay**

17 3'UTR of *Cluh* and *Smyd1* was amplified by PCR from mouse heart cDNA and cloned downstream to  
18 luciferase. HEK293T cells were transfected with luciferase plasmid, *Msi2* 4 or 7 encoding plasmids, and  
19 beta-gal plasmid using PEI Max 40000 (PolySciences, USA). The next day transfection medium was  
20 exchanged with fresh medium, and cells were further grown for forty-eight hours. Cells were lysed, and  
21 luciferase activity was measured with a GloMax Navigator microplate luminometer (Promega, USA)  
22 using a luciferase assay kit (#E1500 Promega, USA) as per the manufacturer's protocol. Per the  
23 manufacturer's instruction, the beta-galactosidase enzyme activity was measured using a kit (#E2000,  
24 Promega, USA). Luciferase readings were divided with beta-galactosidase readings to normalize for  
25 transfection differences. Three independent experiments were performed with three replicates per group  
26 each time.

#### 27 **Cell size measurements**

28 Neonatal rat cardiomyocytes were stained with alpha-sarcomeric actinin (#MA1-22863 Thermo  
29 Scientific, USA) and DAPI. AC16 cells were stained with wheat germ agglutinin (#MP00831 Thermo  
30 Scientific, USA) and DAPI. All images were taken with 20X objective using Leica DMI 6000 B (Leica  
31 Microsystems, USA). Cell size was calculated with ImageJ software. All the experiments were repeated  
32 three times (biological replicate) with three wells for each group (technical replicate). More than a  
33 hundred cells were counted from each well.

1 Paraffin-embedded heart sections were deparaffinized and stained with wheat germ agglutinin  
2 (#MP00831 Thermo Scientific, USA) and DAPI. Images from different regions of the heart were taken  
3 with a 20X objective using Leica DMI 6000 B (Leica Microsystems, USA). Cell size was measured using  
4 ImageJ software.

#### 5 **Fibrosis staining**

6 Picrosirius red (Sigma Aldrich, USA) staining was done on deparaffinized heart sections. Images were  
7 taken with Leica DFC 320 (Leica Microsystems, USA). The percentage fibrosis stain was calculated  
8 using Adobe Photoshop.

#### 9 **Immunofluorescence**

10 AC16 cells were fixed with four percent paraformaldehyde and permeabilized with 0.1% Triton-X-100.  
11 Cells were washed with PBS and incubated with 5% BSA for blocking. Blocked cells were incubated  
12 overnight with primary antibody against MSI2 (#PA5-31024 Thermo Scientific, USA). The following  
13 day cells were stained with Alexa-Flour 594 labeled secondary antibody (Thermo Scientific, USA) and  
14 DAPI. Images were taken with 20X objective using Leica DMI 6000 B (Leica Microsystems, USA) to  
15 check the localization of MSI2.

#### 16 **Immunohistochemistry**

17 Paraffin-embedded heart sections were cut using a Leica microtome and deparaffinized. Deparaffinized  
18 sections were then heated at 80°C in citrate buffer. Sections were then quenched for endogenous  
19 peroxidase activity by H<sub>2</sub>O<sub>2</sub>. Next sections were permeabilized using 0.3% Triton-X-100 and blocked  
20 with 5% BSA. Blocked sections were then incubated with MSI2 antibody overnight at 4°C. The next day,  
21 sections were incubated with HRP-labeled secondary antibody at room temperature for two hours.  
22 Sections were then exposed to DAB substrate and counter-stained with hematoxylin for nuclear staining.

#### 23 **Transmission Electron microscopy**

24 TEM experiments were performed as described with minor modifications [2]. The mouse heart's tissue  
25 pieces (1mm<sup>3</sup>) were fixed in 2.5% glutaraldehyde and 4% paraformaldehyde in 0.1M phosphate buffer,  
26 pH 7.4, and post-fixed in 1% osmium tetroxide. This was followed by dehydration in ascending series of  
27 ethanol, infiltration, and embedding in Spurr resin. Ultra-thin sections (60-70nm) were obtained using  
28 Leica EM UC7 ultra-microtome (Wetzlar, Germany), picked up on 200 mesh copper grids, and dual  
29 stained with uranyl acetate and lead citrate. Grids were observed under JEOL JEM 1400 TEM, and data  
30 were collected using a Gatan Orius SC 200B CCD camera at 100kV with GATAN digital micrograph  
31 software.

#### 32 **Animal experiments**

33 All the animal experiments were carried out on C57BL/6 mice provided by National Laboratory Animal  
34 Centre, CSIR-CDRI, Lucknow, India. C57BL/6 adult male mice were injected with  $1.8 \times 10^{12}$  AAV9 viral



1 particles intravenously. Echocardiography was done to analyze cardiac function using Vevo 1100  
2 (Fujifilm VisualSonics, USA) under 2-3% isoflurane given by inhalation. Echocardiography was done  
3 after fourteen days post viral injection for AAV9-*Msi2* 4 and twenty-one days for AAV9-*Msi2* 7 injected  
4 animals, respectively. Mice were euthanized by cervical dislocation after anesthesia with isoflurane (3%),  
5 and the heart was explanted for further molecular and histological assays. The tibia was taken out, and the  
6 length was measured. For the TAC surgery, adult SD rats were used. The transverse aorta was partially  
7 occluded using an 18G needle. Post-surgery rats were initially recovered under a warming lamp and  
8 observed through the course of experiments. The local IAEC (Institutional Animal Ethics Committee)  
9 committee at CSIR-Central Drug Research Institute approved all the animal experiments (IAEC/2020/38)  
10 following the guidelines of the Committee for the Purpose of Control and Supervision of Experiments on  
11 Animals (CPCSEA), New Delhi, Government of India. All the animal procedures performed conform to  
12 the guidelines from Directive 2010/63/EU of the European Parliament on the protection of animals used  
13 for scientific purposes.

#### 14 **Global Proteomics**

15 AAV9-GFP and AAV9-*Msi2* 4 injected animals were sacrificed fourteen days post-injection, and hearts  
16 were explanted for proteomics. Vproteomics, Valerian Chem Private Limited, India, performed the  
17 proteomics per the following protocol. Trypsin digestion was done at 37°C for 16 hours with fifty  
18 micrograms of heart tissue. Digested lysates were cleaned using a C18 silica cartridge and dried. The  
19 dried pellet was resuspended in a buffer with 2% acetonitrile and 0.1% formic acid. Mass spectrometric  
20 analysis of the peptide mixtures was performed on Ultimate 3000 RSLC nano system coupled with a  
21 Tribrid Orbitrap Eclipse (Thermo Fisher Scientific, USA). 1µg of the sample was loaded on Acclaim  
22 PepMap 75 µm x 2 cm C18 guard column (3µm particle size). Peptides were eluted with a 0–40 %  
23 gradient of a buffer consisting of 80 % acetonitrile and 0.1 % formic acid and separated on a 50 cm, three  
24 µm Easy-spray C18 column (Thermo Fisher Scientific, USA) at a flow rate of 300 nl / min and injected  
25 for MS analysis. LC gradients were run for 110 min. MS1 spectra were acquired in the Orbitrap (R=  
26 240k; AGQ target = 400,000; Max IT = 50 ms; RF Lens = 30%; mass range = 375–1500 m/z; centroid  
27 data). Dynamic exclusion was employed for 10 sec, excluding all charge states for a given precursor. MS  
28 2 spectra were collected in the linear ion trap (rate = Rapid; AGQ target = 30000; MaxIT = 20 ms;  
29 NCEHCD = 30%). Generated raw data were analyzed with Proteome Discoverer (v2.2) against the  
30 UniProt *Mus musculus* proteome (UP000000589) database. For the Sequest search, the precursor and  
31 fragment mass tolerances were set at ten ppm and 1.0 Da, respectively. The protease used to generate  
32 peptides, i.e., enzyme specificity, was set for trypsin/P (cleavage at the C terminus of “K/R: unless  
33 followed by “P”) and with GluC on Glutamic acid along with maximum missed cleavages value of two.  
34 Carbamidomethyl on cysteine as fixed modification and oxidation of methionine and N-terminal

1 acetylation were considered variable modifications for database search. Both peptide spectrum match and  
2 protein false discovery rate were set to 0.01 FDR. Raw abundance values were used for the statistical  
3 analysis. For each test, raw abundance values were filtered based on valid values (They should be present  
4 in at least 70% of samples within the group). Missing values were imputed based on standard deviation.  
5 Abundance values were log<sub>2</sub> standardized, Median Based Quantile Normalisation followed by Z-score  
6 scaling matrix used to plot Heatmap, Boxplot. For comparison of the two groups, student t-test was used.

### 7 **MSI2 pull-down**

8 HEK293T cells were seeded in 150 mm cell culture dishes and transfected with luciferase plasmids  
9 having 3'UTR of *Cluh* and *Smyd1* (used for luciferase assay) together with MSI2 isoform four  
10 overexpressing plasmid. Cells were cross-linked with 254nm UV exposure for 10min after sixty hours of  
11 transfection. The cells were harvested, washed with PBS, and stored at -80°C until use. MSI2 pull-down  
12 was performed using Dynabeads antibody coupling kit (Invitrogen 14311D) per the manufacturer's  
13 instruction. Dyna beads M-270 were washed per kit instructions and then incubated with 10µg of MSI2  
14 and IgG antibody separately at 37°C with continuous shaking overnight. Cells were thawed and lysed  
15 with 1X NP-40 lysis buffer (1mL) for 15 min, and lysates were collected by centrifugation at 13000Xg  
16 for 15min at 4°C. 80µl of input volume was taken out for RNA isolation and western blot, and the  
17 remaining volume proceeded for pull-down. Lysates were incubated with antibody-coupled Dyna beads at  
18 4°C for 1hr with rotation. The beads were then washed in RIP buffer, and 30% of the fraction was taken  
19 for protein and 70% for RNA, which were further proceeded for RNA isolation with miRNeasy kit.

### 20 **RNA sequencing analysis**

21 Publicly available transcriptomic data for nine sham mouse samples were retrieved from the NCBI GEO  
22 database (Gene Expression Omnibus) under the accession number GSE180794, where three replicates of  
23 each cell type were obtained from cardiomyocytes, fibroblasts, and endothelial cardiac cell types to  
24 investigate the expression of the *Msi2* gene in these cell fractions of the heart. *Msi2*'s different transcript  
25 expression and exon coverage were calculated from the cardiomyocyte fraction. The raw sequencing  
26 reads downloaded were preprocessed for adaptor trimming and quality control using the FASTP program  
27 (v0.21.0) [4]. The HISAT2 tool was used to index the reference genome and annotation file for *Mus*  
28 *musculus*, which was downloaded from the NCBI genome database (assembly GRCm39) [16]. The high-  
29 quality FASTQ files of each cell type were aligned to the indexed reference genome using the HISAT2  
30 RNA-Seq aligner. The alignment was then assembled into potential transcripts using StringTie (v2.2.0)  
31 [21]. The per-base transcript and exon coverage for each *Msi2* transcript were calculated. The StringTie  
32 assembled transcripts were merged with the reference annotation file to generate a non-redundant set of  
33 transcripts observed in any previously assembled samples. The transcript abundance was then calculated

1 using the merged annotation file to generate re-estimated normalized read counts for each transcript as  
2 fragments per kilobase of transcript per million reads (FPKM) values.

### 3 **Statistics**

4 All the data were analyzed with GraphPad Prism software. All the data are presented as mean±sem. T-test  
5 was done to calculate the significance between the two groups. One-way ANOVA with post hoc Dunnett  
6 or Tukey test was used to calculate significance between more than two groups wherever required. P  
7 value ≤0.05 was considered significant.

## 8 **Results**

### 9 **1. *In vitro* functional characterization of *Msi2***

10 To explore the functions of the Musashi family of RNA-binding proteins, we checked the expression of  
11 both family members, *Msi1* and *Msi2*, in the C57BL6 mouse hearts. Similar to published reports, *Msi1*  
12 was confirmed to be absent in the heart, while *Msi2* was well expressed (**Fig. 1A**). We also confirmed  
13 MSI2 expression at the protein level in primary neonatal SD rat cardiomyocytes, adult SD rat hearts, and  
14 adult C57BL6 mouse hearts (**Fig. 1B**). Furthermore, to study the cell type enrichment of *Msi2* in the  
15 heart, we used a publicly available RNA sequencing dataset (GSE180794) from mouse hearts fractionated  
16 into cardiomyocytes, fibroblast, and endothelial cells [8]. *Msi2* was significantly enriched in  
17 cardiomyocyte fraction compared to the healthy heart's fibroblast and endothelial cell fraction (**Fig. 1C**).  
18 Next, five different validated isoforms of *Msi2* are listed in NCBI. However, to understand the cardiac  
19 function of *Msi2*, it is necessary to know the isoforms expressed in the heart. Hence, we took the  
20 cardiomyocyte fraction RNA sequencing data and checked for different *Msi2* transcripts. We found *Msi2*  
21 isoforms NM\_054043.3 (isoform 1), NM\_001363195.1 (isoform 4), NM\_001373923.1 (isoform 5),  
22 XM\_036157063.1 and XM\_036157068.1 to be well expressed (**Supplementary Table 2**). Moreover, we  
23 also assessed exon coverage for these five isoforms and found the highest exon coverage for  
24 XM\_036157068.1, followed by XM\_036157063.1, isoform 5, isoform 4, and isoform 1 being the least  
25 (**Supplementary Table 3**). For ease of labeling, we have further numbered XM\_036157063.1 as isoform  
26 6 and XM\_036157068.1 as isoform 7 in the article. To understand the isoform-specific variations, an  
27 exon-wise schematic for all five isoforms is presented in **Fig. 1D**. All five isoforms at the protein level  
28 possess two canonical RRM domains for RNA binding with variations only at C-terminal (**Fig. 1D**). To  
29 validate the RNA sequencing data, we designed a PCR primer pair that can amplify all isoforms of *Msi2*  
30 (except isoform 2) with products of different sizes. We found three different isoforms of *Msi2* to be  
31 amplified from the mouse hearts (**Supplementary Fig. 1A**). DNA sequencing of the PCR products  
32 revealed the presence of isoforms 5, 6, and 7, shown by specific exon-exon junctional reads  
33 (**Supplementary Fig. 1A-B**). However, this PCR probably did not detect *Msi2* isoforms 1 and 4 due to  
34 their low expression in the heart, which is already evident from their low exon coverage. Furthermore, we

1 confirmed the presence of all five isoforms in the murine heart by utilizing specific primers for each  
2 isoform by real-time PCR (**Fig. 1E**). *Msi2* isoforms 5, 6, and 7 were highly expressed, while isoform 4  
3 was less expressed, and isoform 1 was the least, confirming the earlier data (**Fig. 1E**).  
4 Next, to study the function of *Msi2* in the heart, we overexpressed all four isoforms (4, 5, 6 and 7) found  
5 to be expressed in the heart; isoform 1 was left due to its very low expression (**Supplementary Fig. 1C**).  
6 AAV6-mediated overexpression of all *Msi2* isoforms led to a significant increase in primary neonatal rat  
7 cardiomyocyte size showing redundant function since all the isoforms have similar two RRM RNA-  
8 binding domains (**Fig. 1F-G**). The similar hypertrophic effect of *Msi2* isoforms on primary  
9 cardiomyocytes was even evident after transduction with ten times less MOI, confirming pro-  
10 hypertrophic function (**Supplementary Fig. 2**). Furthermore, human cardiac cell line AC16 also  
11 demonstrated a significant increase in cell size upon lentiviral-mediated overexpression of *Msi2* isoforms  
12 (**Supplementary Fig. 3**). These *in vitro* results suggest *Msi2* has a pro-hypertrophic function. Therefore,  
13 we checked the levels of MSI2 in primary cardiomyocytes and hearts during the hypertrophic condition.  
14 MSI2 was significantly upregulated in primary cardiomyocytes treated with isoproterenol  
15 (**Supplementary Fig. 4**). Similar to neonatal rat primary cardiomyocytes, the *Msi2* expression level was  
16 significantly induced after four weeks of pressure-overload-induced hypertrophy in rats (**Fig. 1H**).  
17 However, *Msi2* expression follows a downward trend during longer durations of pressure overload (**Fig.**  
18 **1H**). These results indicate a pro-hypertrophic role for *Msi2*.

## 19 2. *In vivo* cardiac overexpression of *Msi2* causes heart-failure

20 Next, to confirm the *in vitro* pro-hypertrophic effect of *Msi2*, we selected two *Msi2* isoforms 4 and 7. One  
21 of the apparent differences between abundantly expressed isoforms (5,6,7) and low expressed isoforms  
22 (1,4) is the exclusion and inclusion of the penultimate exon of 73 base pairs, respectively, leading to  
23 differences at the protein c-terminal (**Fig. 1D**). Therefore, isoform 4 was selected from low expressed as it  
24 includes the penultimate exon. Isoform 7 was chosen among the abundant isoforms due to its uniqueness  
25 of excluding both alternatively spliced penultimate exons (209/155 base pairs and 73 base pairs),  
26 providing an opportunity to elucidate the effects of these exons on MSI2 cardiac functions (**Fig. 1D**). To  
27 study the *in vivo* effects, we injected adult mice with  $1.8 \times 10^{12}$  AAV9-*Msi2* 4/7 and AAV9-GFP control as  
28 previously done [12]. MSI2 isoforms 4 and 7 were successfully overexpressed in the heart injected with  
29 AAV9-*Msi2* compared to controls (**Fig. 2A-C**). Both isoforms of *Msi2* led to early death in mice  
30 compared to the control (**Fig. 2D**). *Msi2* isoform 4 and 7 overexpression caused massive cardiac  
31 hypertrophy evident from the gross morphology (**Fig. 2E**) and significantly increased heart weight to tibia  
32 length ratio (**Fig. 2F**). AAV9-*Msi2* transduced hearts revealed heart-failure phenotype during the  
33 echocardiographic analysis of cardiac function (**Fig. 2G-K**). *Msi2* overexpressed hearts displayed  
34 significantly reduced ejection fraction (**Fig. 2G**), fractional shortening (**Fig. 2H**), and cardiac output (**Fig.**

1 **2I**). Additionally, increased left ventricular mass (**Supplementary Fig. 5A**), left ventricular end-systolic  
2 diameter (**Fig. 2J**), left ventricular end-diastolic diameter (**Fig. 2K**), left ventricular systolic volume  
3 (**Supplementary Fig. 5B**), and left ventricular diastolic volume (**Supplementary Fig. 5C**) was found  
4 suggesting hypertrophy together with dilation. Next, we measured the cardiomyocyte cross-sectional area  
5 in heart sections to confirm the hypertrophy by wheat germ agglutinin staining. *Msi2* overexpressing  
6 cardiomyocytes depicted increased area (**Fig. 3A-B**), demonstrating cardiac hypertrophy. Furthermore,  
7 *Msi2* overexpressing hearts showed increased fibrosis by picrosirius red staining under bright fields (**Fig.**  
8 **3C-D**). At the molecular level, *Msi2* overexpression in hearts activated the cardiac remodeling gene  
9 program, as seen by significantly increased *Nppa*, *Nppb*, and *Myh7/Myh6* levels (**Fig. 3E-G**). Our data  
10 show that cardiac overexpression of *Msi2* leads to heart failure due to hypertrophy, dilation, and  
11 activation of pathological cardiac remodeling.

### 12 **3. Overexpression of *Msi2* causes global downregulation of nuclear-encoded mitochondrial** 13 **genes**

14 *Msi2* functions in diverse ways, from regulating pri-microRNA processing, mRNA decay, and  
15 translational inhibition depending upon its localization in cells [1, 5, 14]. Therefore, to explore the cardiac  
16 functions of *Msi2*, we checked the cellular localization of MSI2 protein in human cardiac cell line AC16  
17 by immunofluorescence. Basal MSI2 and its isoforms 4 and 7 were found mainly localized in the  
18 cytoplasm (**Supplementary Fig. 6A**) in the AC16 cell line. Furthermore, MSI2 localization was also  
19 checked in murine heart sections. MSI2 was primarily found to be localized in the cytoplasm at the basal  
20 level and after overexpression (**Supplementary Fig. 6B**). Based on cytoplasmic localization, *Msi2* can be  
21 predicted to function either as an inducer of mRNA decay or a translational inhibitor [1, 14]. As *Msi2*  
22 could regulate gene expression at the RNA or protein level, we performed an LC-MS/MS-based global  
23 proteomic profiling of AAV9-*Msi2* 4 overexpressed and control hearts. Proteomic profiling identified  
24 3170 proteins, with 2692 proteins common to both groups, while others were unique (**Fig. 4A**). Principal  
25 component analysis of the proteomics data exhibited two completely separated clusters representing each  
26 group (**Fig. 4B**). *Msi2* overexpression significantly altered 1037 proteins, with 495 upregulated and 542  
27 downregulated (**Fig. 4C-D**) (**Supplementary Table 4**).

28 We performed gene ontology (GO) analysis using Metascape online tool to understand the significance of  
29 differentially expressed proteins. GO analysis revealed enrichment of several processes related to  
30 mitochondria like mitochondrion organization, mitochondrial biogenesis, mitochondrial fatty acid beta-  
31 oxidation of saturated fatty acids, TCA cycle, and respiratory electron transport, and cardiac muscle  
32 contraction suggestive of dysfunctional mitochondria and energy-deprived failing heart (**Fig. 4E**).  
33 Mitochondria only encode thirteen protein-coding genes and depend on several nuclear-encoded proteins  
34 for proper functioning [28]. Interestingly, among the downregulated proteins in *Msi2* overexpressing

1 hearts, more than half were nuclear-encoded mitochondrial proteins (**Fig. 4F and Supplementary Fig.**  
2 **7**), thus supporting the GO outcome of mitochondrial dysfunction. Next, to validate the GO outcome of  
3 mitochondrial dysfunction in MSI2 overexpressing hearts, we performed transmission electron  
4 microscopic (TEM) imaging of AAV9-*Msi2* isoform 4 and 7 treated hearts and control. Using the thin  
5 sectioning TEM technique, we demonstrated a disorganized arrangement of mitochondria and  
6 mitochondria with wider and less packaged cristae with bulge tips in *Msi2* overexpressing hearts (**Fig.**  
7 **5A**).

8 On the contrary, control AAV9-GFP treated hearts have a regular mitochondrial arrangement parallel to  
9 sarcomeres with preserved structural integrity and tightly packed cristae, thus confirming mitochondrial  
10 dysfunction in MSI2 overexpressing hearts (**Fig. 5A**). Mitochondrial dysfunction is a common  
11 phenomenon in failing hearts. Therefore, to verify that the mitochondrial dysfunction phenotype is a  
12 direct effect of MSI2 overexpression and is not confounded by the underlying failing cardiac phenotype,  
13 we measured the mitochondrial transmembrane potential with TMRE red dye *in vitro* in primary  
14 cardiomyocytes. After overexpression of *Msi2* 4 and 7, primary cardiomyocytes showed significantly  
15 reduced red fluorescence confirming lower mitochondrial transmembrane potential, compared to GFP  
16 control (**Fig. 5B-C**). These results demonstrate that increased levels of both *Msi2* isoforms 4 and 7 induce  
17 mitochondrial dysfunction leading to cardiac malfunctioning.

#### 18 **4. *Msi2* targets nuclear-encoded regulatory factors *Cluh* and *Smyd1***

19 MSI2 is known to directly bind to the 3'UTR of its targets and destabilize them, leading to the  
20 downregulation of the target at mRNA and protein. Hence, to identify downstream targets of MSI2, we  
21 focussed on downregulated proteins from proteomics. Based on the proteomics data showing enrichment  
22 for nuclear-encoded mitochondrial proteins among downregulated proteins, we hypothesize that MSI2  
23 may directly target broad regulators, which may affect the expression of nuclear-encoded mitochondrial  
24 genes at the transcriptional or post-transcriptional level. Therefore, we checked the molecular function of  
25 all downregulated proteins from GO (gene ontology) molecular function and identified seventy-two  
26 proteins with DNA or RNA binding and transcriptional or translational regulatory function  
27 (**Supplementary Table 5**). Next, among these proteins, we identified two nuclear-encoded broad  
28 regulatory factors, *Cluh* and *Smyd1*, which are known to control mitochondrial structure and function.  
29 *Cluh* is an RNA-binding protein that regulates the stability and translation of various nucleus-encoded  
30 mitochondrial genes [29]. *Smyd1* is a muscle-specific histone methyltransferase known to regulate  
31 mitochondrial energetics by controlling the expression of several regulatory factors [20, 33]. Hence, these  
32 proteins may act as downstream targets of *Msi2*, controlling the expression of several nucleus-encoded  
33 mitochondrial genes. Like proteomics, AAV9-*Msi2* 4 and 7 treated hearts have significantly lower *Cluh*  
34 and *Smyd1* mRNA levels than the control (**Fig. 6A-B**). Furthermore, overexpression of both isoforms of

1 *Msi2* in primary cardiomyocytes also significantly downregulated *Cluh* and *Smyd1* levels, showing them  
2 as putative targets of *Msi2* (**Fig. 6C-D**). Next, we assessed whether lower levels of *Cluh* and *Smyd1*  
3 mRNAs are due to destabilization induced by MSI2. Primary cardiomyocytes overexpressing MSI2  
4 treated with actinomycin D showed significantly lower levels of *Cluh* and *Smyd1* compared to the control  
5 (**Fig. 6E**). Thus declined levels of *Cluh* and *Smyd1* mRNAs are due to the effect induced by MSI2 on  
6 their stability. Additionally, *Hadha*, *Pcca*, *Pdha1*, *Acat1*, and *Mccc1* validated targets of *Cluh*, and  
7 *Ppargc1a* and *Perml* validated targets of *Smyd1* were significantly downregulated in *Msi2*  
8 overexpressing hearts (**Fig. 6F-G**). These results indicate *Cluh* and *Smyd1* as the potential downstream  
9 target of *Msi2*, regulated by mRNA decay. *Msi2* recognizes its target mRNA for degradation by the  
10 presence of multiple copies of the UAG sequence in its 3'UTR [1]. In silico analysis of 3'UTR of *Cluh*  
11 and *Smyd1* revealed eight and twenty-one putative UAG binding motifs, respectively. Therefore to  
12 confirm *Cluh* and *Smyd1* as the direct targets, we cloned 3'UTR of both genes downstream to luciferase.  
13 The overexpression of *Msi2* isoforms 4 and 7 significantly decreased luciferase activity with *Cluh* and  
14 *Smyd1* 3'UTR, confirming them as direct targets (**Fig. 6H-I**). Furthermore, to ensure that the decline in  
15 luciferase activity is due to the direct binding of MSI2 to the *Cluh* and *Smyd1* 3'UTR, we performed  
16 ribonucleoprotein immunoprecipitation of MSI2. Significant enrichment of *Cluh* and *Smyd1* 3'UTR  
17 regions was found in the MSI2 pull-down fraction compared to IgG control, validating *Cluh* and *Smyd1*  
18 as the direct downstream target of MSI2 (**Fig. 6J**). Furthermore, overexpression of either *Cluh* or *Smyd1*  
19 prevented *Msi2*-induced cardiac hypertrophy in primary cardiomyocytes (**Fig. 7A-B**). Additionally,  
20 mitochondrial dysfunction induced by MSI2 was partially rescued by overexpression of downstream  
21 targets *Cluh* and *Smyd1* (**Fig. 7C-D**). Thus, these results establish *Cluh* and *Smyd1* as direct downstream  
22 targets of *Msi2*.

23

## 24 **Discussion**

25 A cell's amount of translatable mRNA depends upon its synthesis and decay [30]. The purpose of mRNA  
26 decay is either to function as a quality control mechanism to eliminate unwanted proteins or to regulate  
27 the abundance of proteins by altering their half-lives [30]. RBPs regulate mRNA half-lives and their  
28 translation by forming mRNA ribonucleoprotein complexes [30]. RBPs involved in these processes  
29 mainly bind to mRNA 3'UTRs through specific sequence motifs and can promote or hinder the binding  
30 of decay factors or regulate translatable status [30]. RBPs-mediated control of mRNA decay and  
31 translation plays a pivotal role in cardiovascular development and disease; however, its role in  
32 cardiovascular diseases remains less explored [9]. Recently, Zhou A et al. have shown that an RBP HuR  
33 increases levels of *Mef2c* in cardiomyocytes by binding and stabilizing its mRNA through ARE elements  
34 in 3' UTR [36]. Likewise, another RBP, *Pcbp2*, was shown to have an anti-hypertrophic function in

1 cardiomyocytes by promoting the degradation of *Gpr56* mRNA [35]. Similarly, RBP *Celf1* binds to *Cx43*  
2 (connexin 43) mRNA by binding UG-rich regions in its 3' UTR, promoting dilated cardiomyopathy [3].  
3 Here, we demonstrate a novel pro-hypertrophic cardiac function for an RBP *Msi2* via regulating mRNA  
4 decay. MSI2 was found to be expressed in mice and rat hearts, and rat primary cardiomyocytes at protein  
5 level. Similar to our results MSI2 was found to be expressed at protein level in heart by Sakakibara et al.  
6 [27]. Recently, Reichert et al. have shown enrichment of MSI2 protein in cardiomyocyte RBPome (RNA-  
7 binding proteome) confirming RNA-binding activity of MSI2 in cardiomyocytes [22]. Additionally, we  
8 found *Msi2* to be enriched in cardiomyocytes compared to other cell types suggesting an important  
9 cardiac function.

10 *Msi2* isoform 4 and 7 overexpression in heart-induced cardiac hypertrophy, dilation, heart failure, and  
11 death. In line with the hypertrophic effect, *Msi2* was found to be significantly increased in pressure-  
12 overload model of cardiac hypertrophy. Global proteomics analysis demonstrated the downregulation of  
13 several nuclear-encoded mitochondrial proteins after *Msi2* overexpression. Electron microscopic imaging  
14 in heart sections and *in vitro* measurement of transmembrane potential in cardiomyocytes confirmed  
15 mitochondrial dysfunction. Mechanistically, *Cluh* and *Smyd1*, broad regulators of mitochondrial structure  
16 and functions, were identified as novel direct targets of *Msi2*. *Msi2* destabilizes *Cluh* and *Smyd1* mRNAs  
17 by directly binding to their 3'UTR. Overexpression of either target *Cluh* or *Smyd1* partially prevented  
18 *Msi2*-induced cardiac hypertrophy and mitochondrial dysfunction in primary cardiomyocytes. Thus,  
19 confirming *Cluh* and *Smyd1* as direct targets and downstream mediators of *Msi2* pro-hypertrophic  
20 function (summarized in **Fig. 8**).

21 Both *Cluh* and *Smyd1* regulate mitochondrial structure and function by controlling the expression of  
22 several nuclear-encoded mitochondrial genes. *Cluh* is an RBP that helps survive post-birth starvation in  
23 neonates, and knockout mice die shortly after birth due to hypoglycemia [29]. Liver-specific knockout in  
24 adult liver shows its role in metabolic adaptation during conditions of high-energy demand like starvation  
25 [29]. *Cluh* exerts its metabolic function by promoting stability and translation of several nuclear-encoded  
26 mitochondrial genes [10, 29]. Some known targets of *Cluh*, like HADHA, PCCA, PDHA1, ACAT1, and  
27 MCCC1, were downregulated in our cardiac proteomics data and at the mRNA level, illustrating the  
28 probable existence of similar molecular mechanisms in the heart. We also showed that *Cluh* could  
29 partially inhibit *Msi2*-induced cardiac hypertrophy and mitochondrial dysfunction, demonstrating a need  
30 to explore the cardiac role of *Cluh* further. Another *Msi2* target, *Smyd1*, is a muscle-specific histone  
31 methyltransferase whose deletion in the adult heart causes cardiac hypertrophy and heart failure [7]. Loss  
32 of *Smyd1* in the adult heart results in mitochondrial dysfunction due to the downregulation of *Ppargc1a*  
33 and *Perml* [20, 33]. Similarly, we have found decreased *Ppargc1a* and *Perml* upon *Msi2*-induced  
34 downregulation of *Smyd1* in the heart.



1 *Msi2* has different isoforms due to alternative splicing [18]. Here, we confirmed the expression of two  
2 novel predicted isoforms, XM\_036157063.1 (isoform 6) and XM\_036157068.1 (isoform 7), together with  
3 isoforms 5, 4, and 1 in the heart. All these three isoforms (5, 6, and 7) highly expressed in the heart have a  
4 common exclusion of the penultimate exon of 73 base pairs. On the other hand, isoforms 4 and 1, which  
5 are low expressed, include this 73 base pair exon. Similarly, in a different study from our lab, alternative  
6 splicing analysis from RNA-seq data of balbc hearts demonstrated an inclusion-to-exclusion ratio of 0.15  
7 for this 73 base pairs exon, confirming exon exclusion as a dominant phenotype in the heart (**data not**  
8 **shown**).

9 Collectively, we have shown a novel pro-hypertrophic function for *Msi2* in the heart leading to  
10 mitochondrial dysfunction, heart failure, and death in mice. Furthermore, we identified two novel targets  
11 of *Msi2*, namely *Cluh* and *Smyd1* (**Fig. 8**). Additionally, we validated the expression of two predicted  
12 *Msi2* isoforms in the heart.

### 13 **Acknowledgments**

14 We want to thank Dr. Rajdeep Guha, Head of Animal Facility, CSIR-CDR, for his help with animal  
15 experiments. We want to thank Dr. Manoj Kumar Barthwal, Dr. Chandra Prakash Pandey, and Dr. Hobby  
16 Aggarwal, Pharmacology Division, for their help with the instruments and training. We acknowledge the  
17 FACS facility, CSIR-CDRI, for using their FACS machine. We acknowledge the valuable suggestions of  
18 Dr. Regalla Kumarswamy, CSIR- Centre for Cellular and Molecular Biology, Hyderabad, India, Dr.  
19 Marisol Ruiz- Meana, Valld'Hebron Hospital Universitari, Barcelona, Spain, and Dr. Gaurav Ahuja,  
20 Indraprastha Institute of Information Technology, Delhi, India.

### 21 **Funding**

22 This work was funded by Ramalingaswami Re-entry Fellowship (BT/RLF/re-entry/14/2019) from the  
23 Department of Biotechnology, Government of India, to SKG. SS, SP, SK, and RKS avail JRF fellowship  
24 from CSIR (Council of Scientific and Industrial Research), Government of India. RK avails SRF  
25 fellowship from ICMR (Indian Council of Medical Research), and AG and ADC avail JRF fellowship  
26 from UGC (University Grant Commission), Government of India.

27 **Disclosure** – TT has filed and licensed patents about non-coding RNAs and is the founder and  
28 shareholder of Cardior Pharmaceuticals GmbH (outside of this manuscript). SKG holds patents about  
29 non-coding RNAs (outside of this manuscript).

30 **Author contribution** – SKG has developed the concept, designed the study, planned experiments,  
31 analyzed results, and prepared the manuscript. SS designed the study, performed most experiments,  
32 analyzed the results, and drafted the manuscript. AG, RK, SP, SK, ADC, and PP helped with neonatal rat  
33 cardiomyocyte isolation, lentivirus, and AAV production. RKS and KM performed electron microscopy  
34 experiments on heart samples. PP and KJ helped with echocardiography and animal experiments. PB and

1 KH provided the rat TAC heart samples. PC and SK performed the RNA sequencing analysis. TT gave  
2 critical inputs and helped in manuscript writing.

### 3 **References**

- 4 1. Bennett CG, Riemondy K, Chapnick DA, Bunker E, Liu X, Kuersten S, Yi R (2016) Genome-  
5 wide analysis of Musashi-2 targets reveals novel functions in governing epithelial cell migration.  
6 *Nucleic Acids Res* 44:3788-3800 doi:10.1093/nar/gkw207
- 7 2. Bhattacharjee A, Hasanain M, Kathuria M, Singh A, Datta D, Sarkar J, Mitra K (2018)  
8 Ormeloxifene-induced unfolded protein response contributes to autophagy-associated apoptosis  
9 via disruption of Akt/mTOR and activation of JNK. *Sci Rep* 8:2303 doi:10.1038/s41598-018-  
10 20541-8
- 11 3. Chang KT, Cheng CF, King PC, Liu SY, Wang GS (2017) CELF1 Mediates Connexin 43 mRNA  
12 Degradation in Dilated Cardiomyopathy. *Circ Res* 121:1140-1152  
13 doi:10.1161/CIRCRESAHA.117.311281
- 14 4. Chen S, Zhou Y, Chen Y, Gu J (2018) fastp: an ultra-fast all-in-one FASTQ preprocessor.  
15 *Bioinformatics* 34:i884-i890 doi:10.1093/bioinformatics/bty560
- 16 5. Choudhury NR, de Lima Alves F, de Andres-Aguayo L, Graf T, Caceres JF, Rappsilber J,  
17 Michlewski G (2013) Tissue-specific control of brain-enriched miR-7 biogenesis. *Genes Dev*  
18 27:24-38 doi:10.1101/gad.199190.112
- 19 6. Corbett AH (2018) Post-transcriptional regulation of gene expression and human disease. *Curr*  
20 *Opin Cell Biol* 52:96-104 doi:10.1016/j.ceb.2018.02.011
- 21 7. Franklin S, Kimball T, Rasmussen TL, Rosa-Garrido M, Chen H, Tran T, Miller MR, Gray R,  
22 Jiang S, Ren S, Wang Y, Tucker HO, Vondriska TM (2016) The chromatin-binding protein  
23 Smyd1 restricts adult mammalian heart growth. *Am J Physiol Heart Circ Physiol* 311:H1234-  
24 H1247 doi:10.1152/ajpheart.00235.2016
- 25 8. Froese N, Cordero J, Abouissa A, Trogisch FA, Grein S, Szaroszyk M, Wang Y, Gigina A, Korf-  
26 Klingebiel M, Bosnjak B, Davenport CF, Wiehlmann L, Geffers R, Riechert E, Jurgensen L,  
27 Boileau E, Lin Y, Dieterich C, Forster R, Bauersachs J, Ola R, Dobrev G, Volkers M, Heineke J  
28 (2022) Analysis of myocardial cellular gene expression during pressure overload reveals matrix  
29 based functional intercellular communication. *iScience* 25:103965  
30 doi:10.1016/j.isci.2022.103965
- 31 9. Gao C, Wang Y (2020) mRNA Metabolism in Cardiac Development and Disease: Life After  
32 Transcription. *Physiol Rev* 100:673-694 doi:10.1152/physrev.00007.2019
- 33 10. Gao J, Schatton D, Martinelli P, Hansen H, Pla-Martin D, Barth E, Becker C, Altmueller J,  
34 Frommolt P, Sardiello M, Rugarli EI (2014) CLUH regulates mitochondrial biogenesis by

- 1 binding mRNAs of nuclear-encoded mitochondrial proteins. *J Cell Biol* 207:213-223  
2 doi:10.1083/jcb.201403129
- 3 11. Guo QQ, Gao J, Wang XW, Yin XL, Zhang SC, Li X, Chi LL, Zhou XM, Wang Z, Zhang QY  
4 (2020) RNA-Binding Protein MSI2 Binds to miR-301a-3p and Facilitates Its Distribution in  
5 Mitochondria of Endothelial Cells. *Front Mol Biosci* 7:609828 doi:10.3389/fmolb.2020.609828
- 6 12. Gupta SK, Garg A, Avramopoulos P, Engelhardt S, Streckfuss-Bomeke K, Batkai S, Thum T  
7 (2019) miR-212/132 Cluster Modulation Prevents Doxorubicin-Mediated Atrophy and  
8 Cardiotoxicity. *Mol Ther* 27:17-28 doi:10.1016/j.ymthe.2018.11.004
- 9 13. Hentze MW, Castello A, Schwarzl T, Preiss T (2018) A brave new world of RNA-binding  
10 proteins. *Nat Rev Mol Cell Biol* 19:327-341 doi:10.1038/nrm.2017.130
- 11 14. Katz Y, Li F, Lambert NJ, Sokol ES, Tam WL, Cheng AW, Airoidi EM, Lengner CJ, Gupta PB,  
12 Yu Z, Jaenisch R, Burge CB (2014) Musashi proteins are post-transcriptional regulators of the  
13 epithelial-luminal cell state. *Elife* 3:e03915 doi:10.7554/eLife.03915
- 14 15. Kharas MG, Lengner CJ (2017) Stem Cells, Cancer, and MUSASHI in Blood and Guts. *Trends*  
15 *Cancer* 3:347-356 doi:10.1016/j.trecan.2017.03.007
- 16 16. Kim D, Paggi JM, Park C, Bennett C, Salzberg SL (2019) Graph-based genome alignment and  
17 genotyping with HISAT2 and HISAT-genotype. *Nat Biotechnol* 37:907-915 doi:10.1038/s41587-  
18 019-0201-4
- 19 17. Kimura T, Ferran B, Tsukahara Y, Shang Q, Desai S, Fedoce A, Pimentel DR, Luptak I, Adachi  
20 T, Ido Y, Matsui R, Bachschmid MM (2019) Production of adeno-associated virus vectors for in  
21 vitro and in vivo applications. *Sci Rep* 9:13601 doi:10.1038/s41598-019-49624-w
- 22 18. Li M, Li AQ, Zhou SL, Lv H, Wei P, Yang WT (2020) RNA-binding protein MSI2 isoforms  
23 expression and regulation in progression of triple-negative breast cancer. *J Exp Clin Cancer Res*  
24 39:92 doi:10.1186/s13046-020-01587-x
- 25 19. Nakamura M, Okano H, Blendy JA, Montell C (1994) Musashi, a neural RNA-binding protein  
26 required for *Drosophila* adult external sensory organ development. *Neuron* 13:67-81  
27 doi:10.1016/0896-6273(94)90460-x
- 28 20. Oka SI, Sabry AD, Horiuchi AK, Cawley KM, O'Very SA, Zaitsev MA, Shankar TS, Byun J,  
29 Mukai R, Xu X, Torres NS, Kumar A, Yazawa M, Ling J, Taleb I, Saijoh Y, Drakos SG,  
30 Sadoshima J, Warren JS (2020) Perml regulates cardiac energetics as a downstream target of the  
31 histone methyltransferase Smyd1. *PLoS One* 15:e0234913 doi:10.1371/journal.pone.0234913
- 32 21. Pertea M, Pertea GM, Antonescu CM, Chang TC, Mendell JT, Salzberg SL (2015) StringTie  
33 enables improved reconstruction of a transcriptome from RNA-seq reads. *Nat Biotechnol* 33:290-  
34 295 doi:10.1038/nbt.3122

- 1 22. Riechert E, Kmietczyk V, Stein F, Schwarzl T, Sekaran T, Jurgensen L, Kamuf-Schenk V, Varma  
2 E, Hofmann C, Rettel M, Gur K, Olschlager J, Kuhl F, Martin J, Ramirez-Pedraza M, Fernandez  
3 M, Doroudgar S, Mendez R, Katus HA, Hentze MW, Volkers M (2021) Identification of dynamic  
4 RNA-binding proteins uncovers a Cpeb4-controlled regulatory cascade during pathological cell  
5 growth of cardiomyocytes. *Cell Rep* 35:109100 doi:10.1016/j.celrep.2021.109100
- 6 23. Roth GA, Mensah GA, Johnson CO, Addolorato G, Ammirati E, Baddour LM, Barengo NC,  
7 Beaton AZ, Benjamin EJ, Benziger CP, Bonny A, Brauer M, Brodmann M, Cahill TJ, Carapetis  
8 J, Catapano AL, Chugh SS, Cooper LT, Coresh J, Criqui M, DeCleene N, Eagle KA, Emmons-  
9 Bell S, Feigin VL, Fernandez-Sola J, Fowkes G, Gakidou E, Grundy SM, He FJ, Howard G, Hu  
10 F, Inker L, Karthikeyan G, Kassebaum N, Koroshetz W, Lavie C, Lloyd-Jones D, Lu HS,  
11 Mirijello A, Temesgen AM, Mokdad A, Moran AE, Muntner P, Narula J, Neal B, Ntsekhe M,  
12 Moraes de Oliveira G, Otto C, Owolabi M, Pratt M, Rajagopalan S, Reitsma M, Ribeiro ALP,  
13 Rigotti N, Rodgers A, Sable C, Shakil S, Sliwa-Hahnle K, Stark B, Sundstrom J, Timpel P,  
14 Tleyjeh IM, Valgimigli M, Vos T, Whelton PK, Yacoub M, Zuhlke L, Murray C, Fuster V,  
15 Group G-N-JGBoCDW (2020) Global Burden of Cardiovascular Diseases and Risk Factors,  
16 1990-2019: Update From the GBD 2019 Study. *J Am Coll Cardiol* 76:2982-3021  
17 doi:10.1016/j.jacc.2020.11.010
- 18 24. Sabater-Arcis M, Bargiela A, Moreno N, Poyatos-Garcia J, Vilchez JJ, Artero R (2021) Musashi-  
19 2 contributes to myotonic dystrophy muscle dysfunction by promoting excessive autophagy  
20 through miR-7 biogenesis repression. *Mol Ther Nucleic Acids* 25:652-667  
21 doi:10.1016/j.omtn.2021.08.010
- 22 25. Sabbah HN (2020) Targeting the Mitochondria in Heart Failure: A Translational Perspective.  
23 *JACC Basic Transl Sci* 5:88-106 doi:10.1016/j.jacbts.2019.07.009
- 24 26. Sakakibara S, Imai T, Hamaguchi K, Okabe M, Aruga J, Nakajima K, Yasutomi D, Nagata T,  
25 Kurihara Y, Uesugi S, Miyata T, Ogawa M, Mikoshiba K, Okano H (1996) Mouse-Musashi-1, a  
26 neural RNA-binding protein highly enriched in the mammalian CNS stem cell. *Dev Biol*  
27 176:230-242 doi:10.1006/dbio.1996.0130
- 28 27. Sakakibara S, Nakamura Y, Satoh H, Okano H (2001) Rna-binding protein Musashi2:  
29 developmentally regulated expression in neural precursor cells and subpopulations of neurons in  
30 mammalian CNS. *J Neurosci* 21:8091-8107
- 31 28. Scarpulla RC (2012) Nucleus-encoded regulators of mitochondrial function: integration of  
32 respiratory chain expression, nutrient sensing and metabolic stress. *Biochim Biophys Acta*  
33 1819:1088-1097 doi:10.1016/j.bbagr.2011.10.011

- 1 29. Schatton D, Pla-Martin D, Marx MC, Hansen H, Mourier A, Nemazanyy I, Pessia A, Zentis P,  
2 Corona T, Kondylis V, Barth E, Schauss AC, Velagapudi V, Rugarli EI (2017) CLUH regulates  
3 mitochondrial metabolism by controlling translation and decay of target mRNAs. *J Cell Biol*  
4 216:675-693 doi:10.1083/jcb.201607019
- 5 30. Schoenberg DR, Maquat LE (2012) Regulation of cytoplasmic mRNA decay. *Nat Rev Genet*  
6 13:246-259 doi:10.1038/nrg3160
- 7 31. Shi R, Ying S, Li Y, Zhu L, Wang X, Jin H (2021) Linking the YTH domain to cancer: the  
8 importance of YTH family proteins in epigenetics. *Cell Death Dis* 12:346 doi:10.1038/s41419-  
9 021-03625-8
- 10 32. Suresh Babu S, Joladarashi D, Jeyabal P, Thandavarayan RA, Krishnamurthy P (2015) RNA-  
11 stabilizing proteins as molecular targets in cardiovascular pathologies. *Trends Cardiovasc Med*  
12 25:676-683 doi:10.1016/j.tcm.2015.02.006
- 13 33. Warren JS, Tracy CM, Miller MR, Makaju A, Szulik MW, Oka SI, Yuzyuk TN, Cox JE, Kumar  
14 A, Lozier BK, Wang L, Llana JG, Sabry AD, Cawley KM, Barton DW, Han YH, Boudina S,  
15 Fiehn O, Tucker HO, Zaitsev AV, Franklin S (2018) Histone methyltransferase Smyd1 regulates  
16 mitochondrial energetics in the heart. *Proc Natl Acad Sci U S A* 115:E7871-E7880  
17 doi:10.1073/pnas.1800680115
- 18 34. Yang W, Yang L, Wang J, Zhang Y, Li S, Yin Q, Suo J, Ma R, Ye Y, Cheng H, Li J, Hui J, Hu P  
19 (2022) Msi2-mediated MiR7a-1 processing repression promotes myogenesis. *J Cachexia*  
20 *Sarcopenia Muscle* 13:728-742 doi:10.1002/jcsm.12882
- 21 35. Zhang Y, Si Y, Ma N, Mei J (2015) The RNA-binding protein PCBP2 inhibits Ang II-induced  
22 hypertrophy of cardiomyocytes through promoting GPR56 mRNA degeneration. *Biochem*  
23 *Biophys Res Commun* 464:679-684 doi:10.1016/j.bbrc.2015.06.139
- 24 36. Zhou A, Shi G, Kang GJ, Xie A, Liu H, Jiang N, Liu M, Jeong EM, Dudley SC, Jr. (2018) RNA  
25 Binding Protein, HuR, Regulates SCN5A Expression Through Stabilizing MEF2C transcription  
26 factor mRNA. *J Am Heart Assoc* 7 doi:10.1161/JAHA.117.007802

27

## 28 **Figure Legends**

29 **Fig. 1. Functional characterization of *Msi2* in vitro.** (A) Expression of Musashi family members *Msi1*  
30 and *Msi2* at mRNA level in the mouse heart (n=5). (B) Western blot showing the presence of MSI2 at the  
31 protein level in neonatal rat cardiomyocytes, adult rat hearts, and adult mice hearts. (C) FPKM read  
32 counts showing the expression level of *Msi2* in different cell fractions of the healthy heart (n=3). (D)  
33 Exon-wise schematic representation of *Msi2* isoforms expressed in the mouse heart (region forming two

1 RRM domains and predicted molecular weights are also shown). (E) Expression levels of total *Msi2* and  
2 its isoforms 1, 4, 5, 6, and 7 in mouse hearts from real-time PCR analysis (n=5). (F, G) Cell size of  
3 neonatal rat cardiomyocytes transduced with AAV6 encoding different isoforms of *Msi2* and GFP as  
4 control at MOI of  $10^5$ , where F shows representative image (n=3). (H) Expression level of *Msi2* in a rat  
5 pressure-overload model (TAC) of hypertrophy at different time points compared to respective sham  
6 animals.  $\alpha$ -SA – alpha sarcomeric actinin, FPKM – fragment per kilobase of transcript per million read  
7 pairs, TAC – transverse aortic constriction. The scale bar represents 50 $\mu$ m. \* $p \leq 0.05$ , \*\* $p \leq 0.01$ ,  
8 \*\*\* $p \leq 0.001$ , \*\*\*\* $p \leq 0.0001$

9 **Fig. 2. AAV9-mediated overexpression of *Msi2* causes heart failure.** (A) The expression level of *Msi2*  
10 at mRNA in murine hearts overexpressing MSI2 or GFP control. (B, C) Western blot showing MSI2 and  
11 GAPDH in heart lysate from AAV9-injected animals encoding for *Msi2* isoform 4 and 7 and GFP as  
12 control (n=5). (D) Kaplan-Meier survival curve for mice injected with AAV9 encoding *Msi2* isoform 4  
13 and 7 and GFP as control (n=7). (E) Representative heart images with overexpression of *Msi2* isoform 4  
14 and 7 and GFP. (F) Heart weight to tibia length ratio of mice treated with AAV9 encoding *Msi2* isoform  
15 4 and 7 and GFP (n=11). (G-K) Echocardiographic parameters showing the cardiac function of AAV9-  
16 *Msi2* isoform 4 and 7 treated animals (n=8 GFP, n=4 *Msi2* 4, n=5 *Msi2* 7). HW- heart weight, TL-tibia  
17 length, EF- ejection fraction, FS – fractional shortening, CO – cardiac output, LVEDS – left ventricular  
18 end-systolic diameter, LVEDD – left ventricular end-diastolic diameter. \* $p \leq 0.05$ , \*\* $p \leq 0.01$ , \*\*\* $p \leq 0.001$ ,  
19 \*\*\*\* $p \leq 0.0001$

20 **Fig. 3. *Msi2* induces pathological remodeling of the heart.** (A, B) Cardiomyocyte size measurement in  
21 heart sections of AAV9-*Msi2* isoform 4 and 7 and GFP using wheat germ agglutinin staining (n=4-5).  
22 (C, D) Fibrosis measurement by picosirius staining of hearts overexpressing *Msi2* isoform 4 and 7  
23 and GFP (n=7). (E-G) Expression levels of *Nppa* (E), *Nppb* (F), and *Myh7/Myh6* (G) mRNA in hearts  
24 overexpressing *Msi2* isoform 4 and 7 and GFP (n=10).  $\mu$ m – micrometer. The scale bar for 3A represents  
25 50 $\mu$ m, and the scale bar for 3D represents 100 $\mu$ m. \* $p \leq 0.05$ , \*\* $p \leq 0.01$ , \*\*\* $p \leq 0.001$ , \*\*\*\* $p \leq 0.0001$

26 **Fig. 4. *Msi2* induced deregulation of the cardiac proteome.** (A-D) Global proteomics analysis in heart  
27 lysate from AAV9-*Msi2* 4 and AAV9-GFP shows the number of proteins identified (A), principal  
28 component analysis of complete proteome (B), heatmap (C), and a volcano plot (D) showing  
29 differentially expressed genes with fold change cut-off of two and p-value  $\leq 0.05$  (n=3). The scale bar  
30 represents 50 $\mu$ m. (E) Gene ontology (GO) term analysis of differentially expressed proteins after *Msi2* 4  
31 overexpression in the heart (mitochondria-related terms are highlighted in bold). (F) Schematics show the  
32 number of nuclear-encoded mitochondrial proteins among up and downregulated proteins from the  
33 proteomics data.

1 **Fig. 5. *Msi2* induces mitochondrial dysfunction.** (A) TEM micrographs of mouse hearts with  
2 overexpression of *Msi2* 4 and 7 and GFP control (arrows highlight mitochondrial distribution and  
3 structural changes observed). The black scale bar represents 2 $\mu$ m while the white one represents 1 $\mu$ m. (B,  
4 C) TMRE staining showing mitochondrial transmembrane potential (function) in primary cardiomyocyte  
5 overexpressing *Msi2* isoforms 4 and 7 and GFP. The scale bar represents 50 $\mu$ m. \*\*\*\*p $\leq$ 0.0001  
6 **Fig. 6. *Cluh* and *Smyd1* are novel targets of *Msi2*.** (A, B) Expression levels of *Cluh* and *Smyd1* mRNA  
7 in hearts overexpressing *Msi2* 4 and 7 and GFP control (n=10). (C, D) *Cluh* and *Smyd1* mRNA  
8 expression levels in neonatal rat cardiomyocytes after AAV6-induced overexpression of *Msi2* isoform 4  
9 and 7 (n=4). (E) Expression level of *Cluh* and *Smyd1* in neonatal rat cardiomyocytes transduced with  
10 AAV6-*Msi2* 4 after four to six hours of Actinomycin D treatment.  
11 (F) Expression levels of *Cluh* target genes *Hadha*, *Pcca*, *Pdha1*, *Acat1*, and *Mccc1* at mRNA in hearts  
12 overexpressing *Msi2* 4 and 7 and GFP control (n=10). (G) Expression levels of *Ppargc1a* and *Perml*  
13 (targets of *Smyd1*) in hearts with overexpression of *Msi2* isoform 4 and 7 (n=10). (H, I) Luciferase  
14 reporter assay with 3'UTR of *Cluh* (H) and *Smyd1* (I) after overexpression of *Msi2* isoform 4 and 7 and  
15 GFP control (n=3). (J) Enrichment level of different regions of *Cluh* and *Smyd1* 3'UTR in MSI2 or IgG  
16 pull-down RNA. \*p $\leq$ 0.05, \*\*p $\leq$ 0.01, \*\*\*\*p $\leq$ 0.0001  
17 **Fig. 7. CLUH and SMYD1 are mediators of the MSI2 function.** (A, B) Neonatal rat cardiomyocyte  
18 cell size after AAV6-mediated overexpression of *Msi2* isoform 4 alone or with *Cluh* or *Smyd1* (n=3). (C,  
19 D) TMRE staining showing mitochondrial transmembrane potential (function) in primary cardiomyocyte  
20 overexpressing *Msi2* isoforms 4 alone or together with *Cluh* or *Smyd1* (n=3). Au – arbitrary unit,  $\alpha$ -SA –  
21 alpha sarcomeric actinin. The scale bar represents 50 $\mu$ m. \*p $\leq$ 0.05, \*\*p $\leq$ 0.01, \*\*\*\*p $\leq$ 0.0001  
22 **Fig. 8.** Schematic summarizing the function of MSI2 in healthy and hypertrophic hearts.

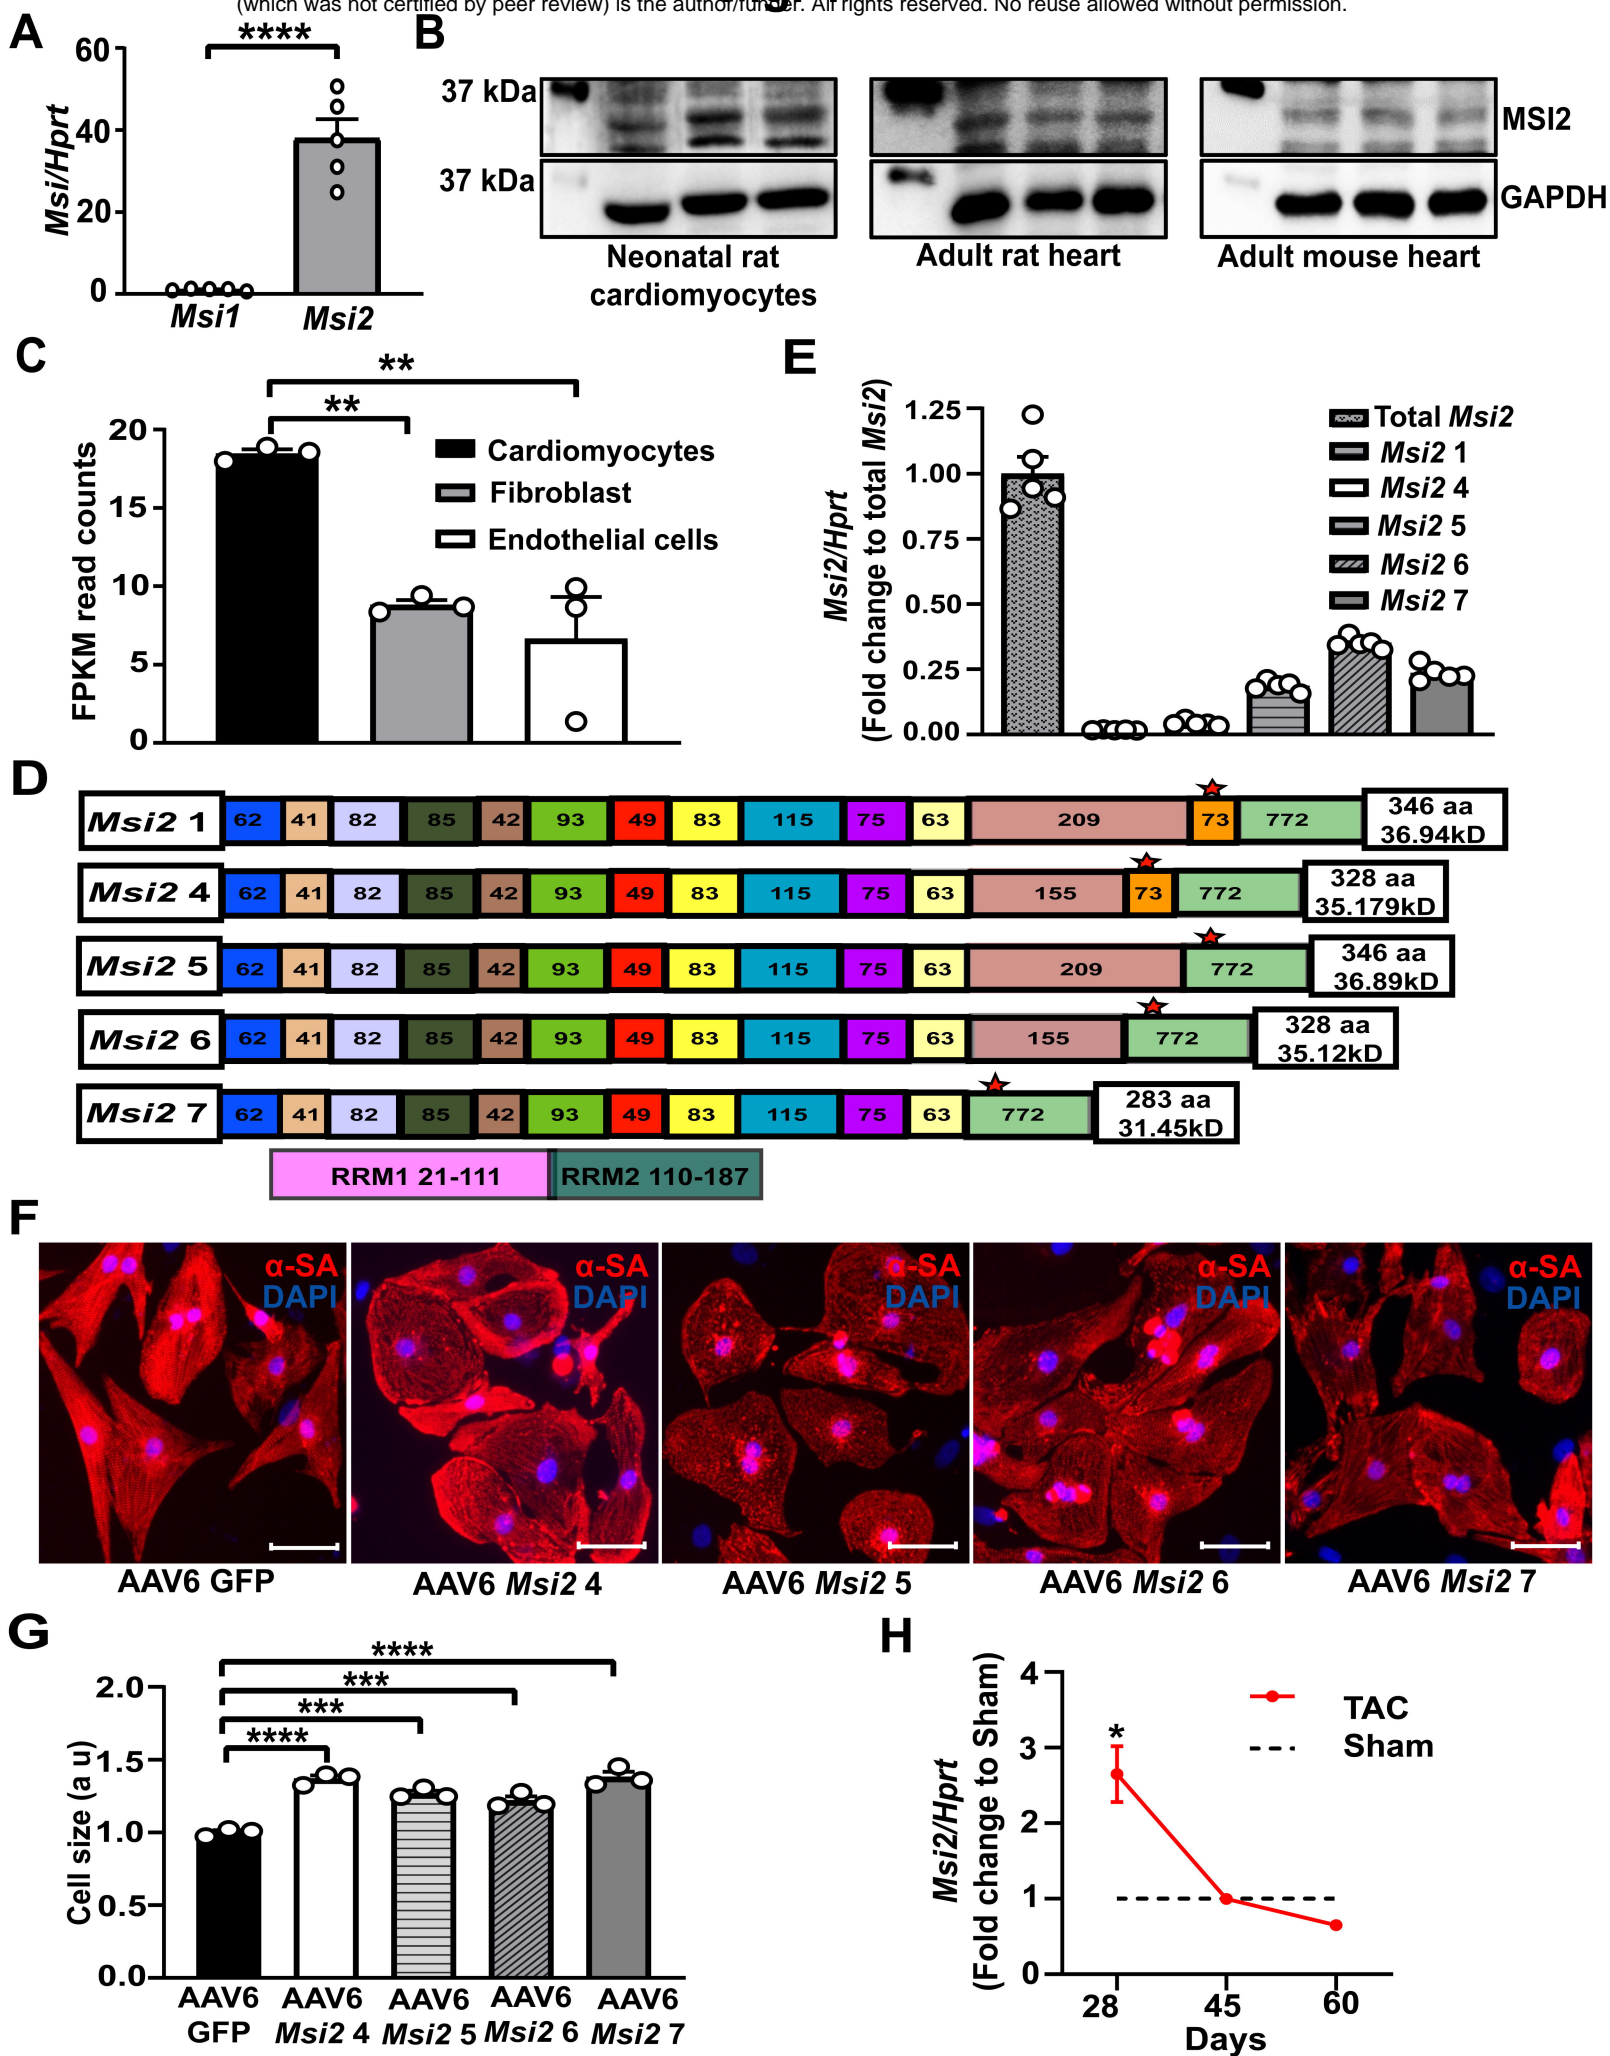



## Fig. 2

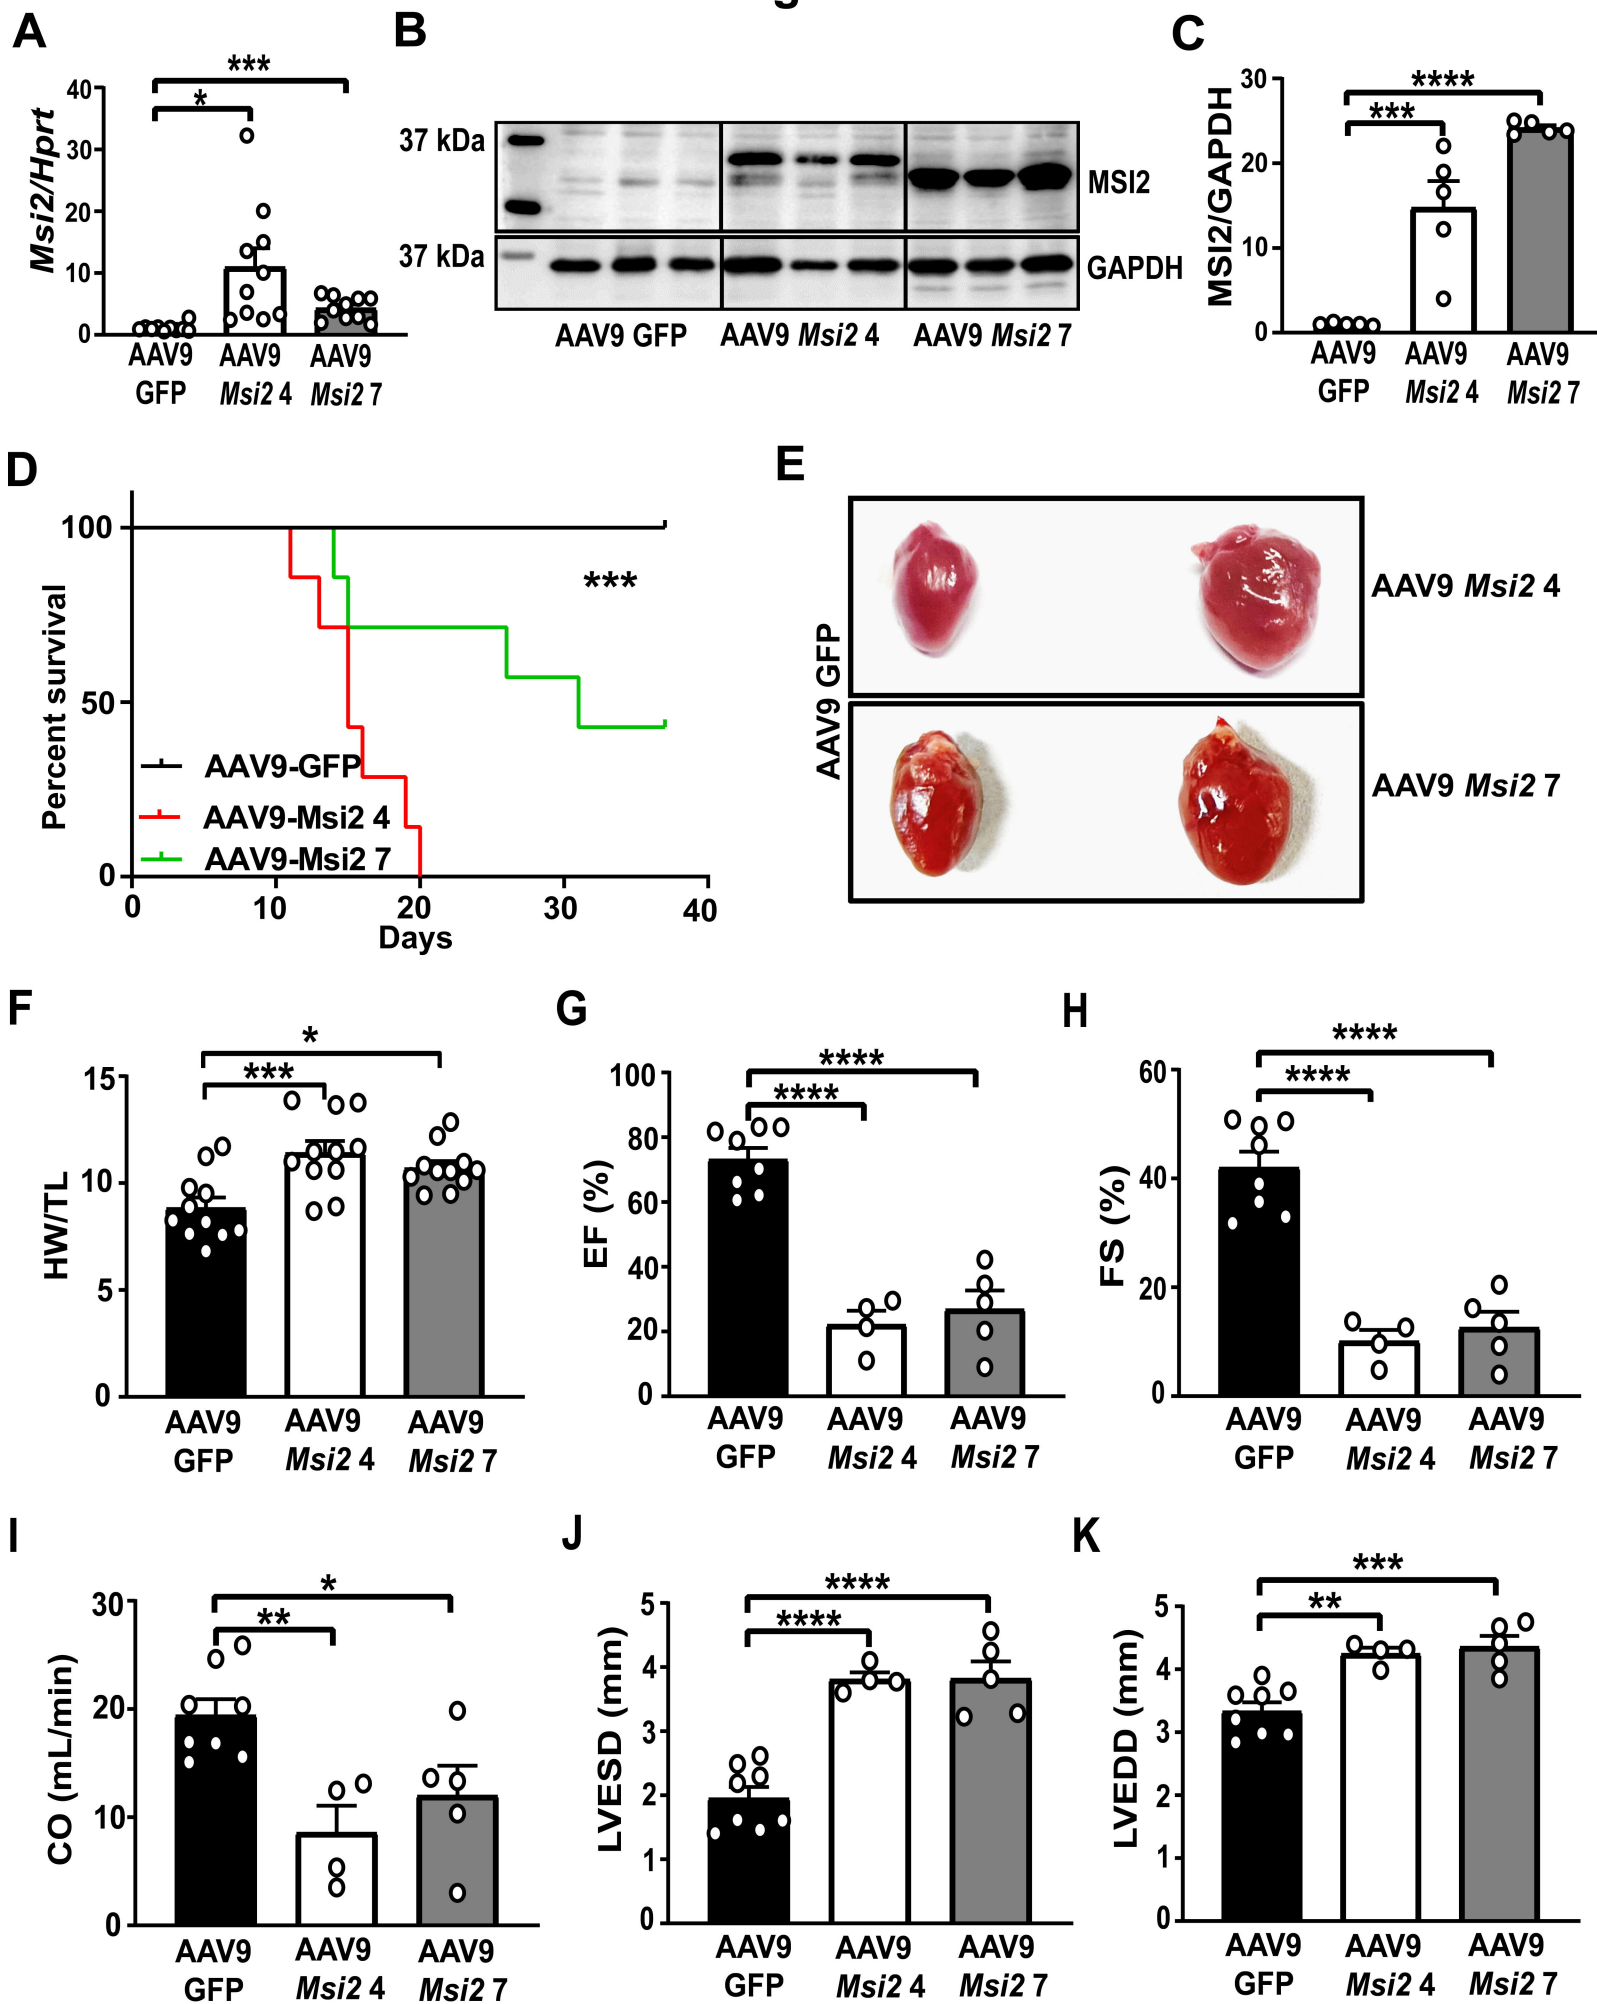

### Fig. 3

**A**

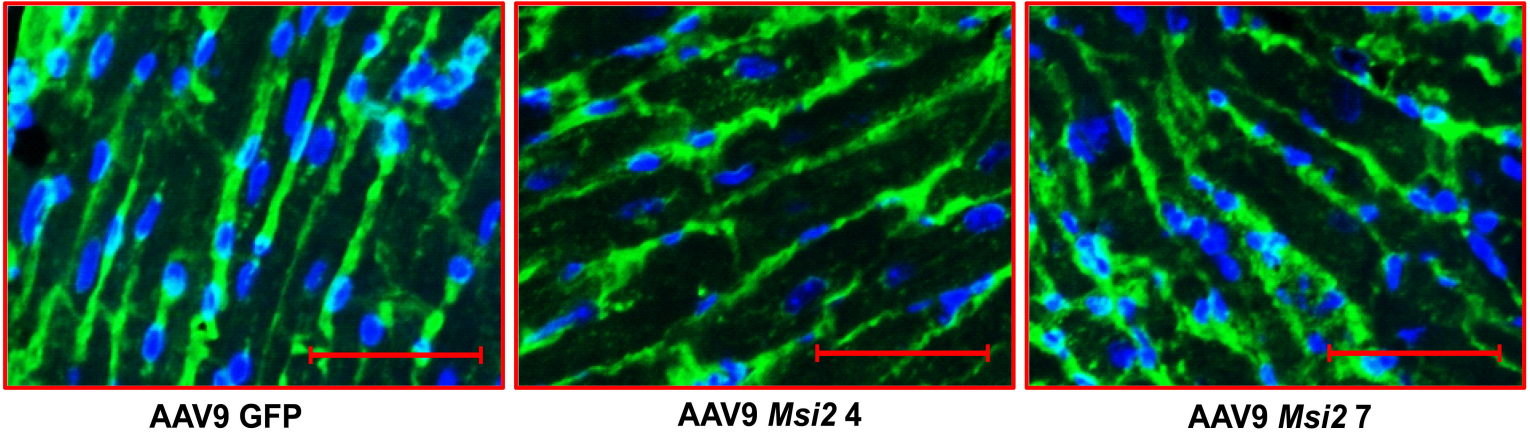

AAV9 GFP

AAV9 *Msi2* 4

AAV9 *Msi2* 7

**B**

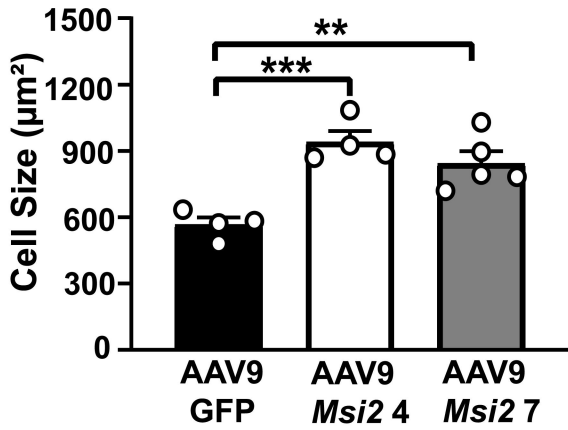

**C**

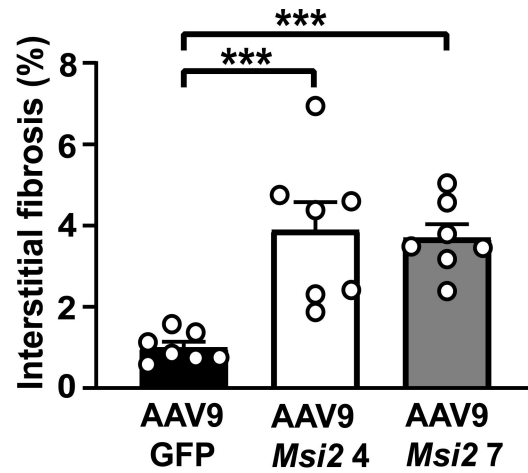

**D**

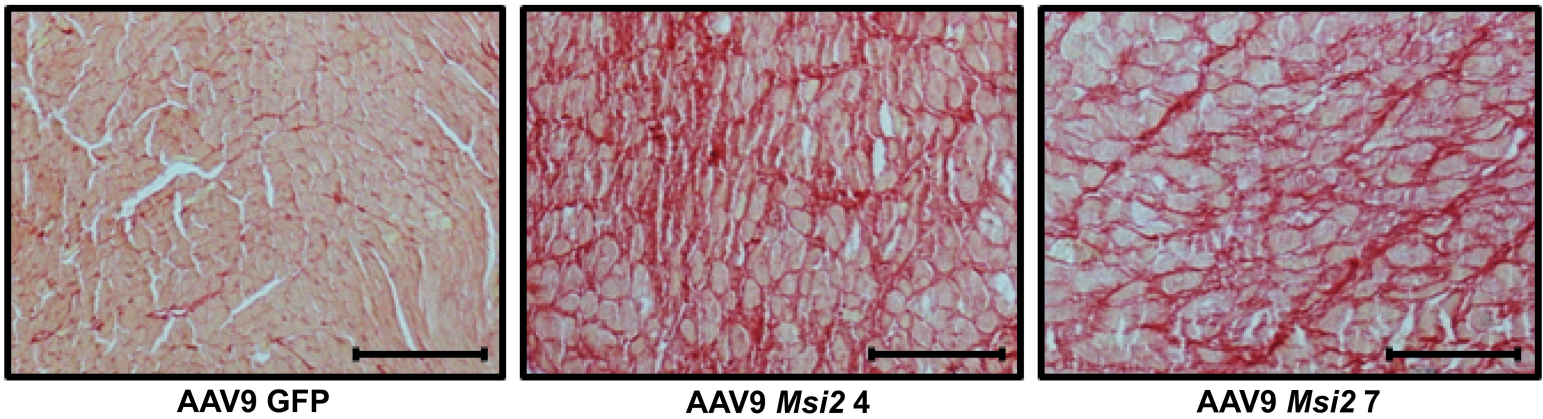

AAV9 GFP

AAV9 *Msi2* 4

AAV9 *Msi2* 7

**E**

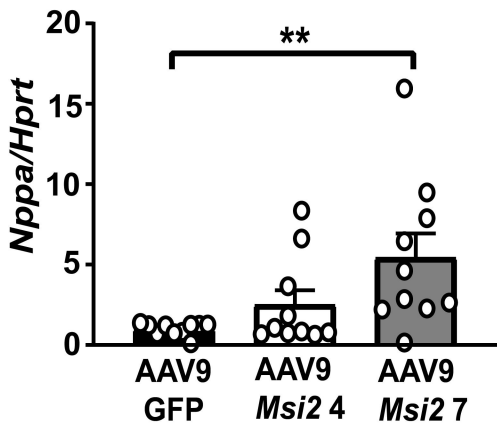

**F**

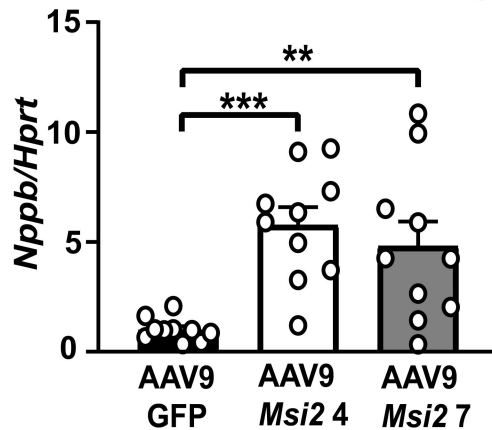

**G**

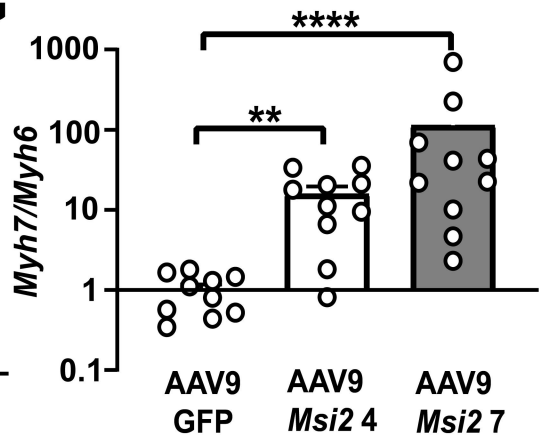

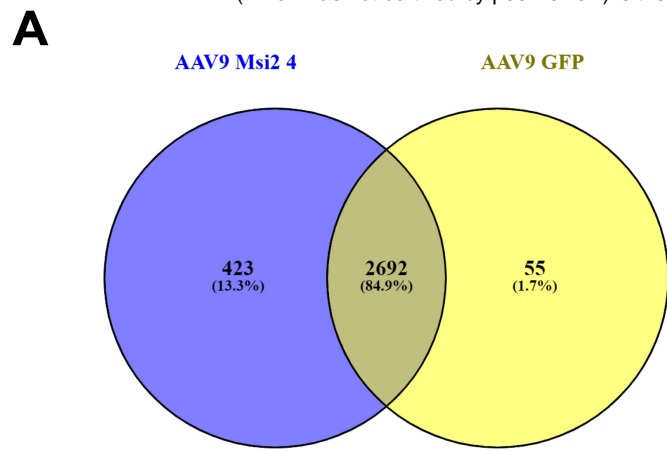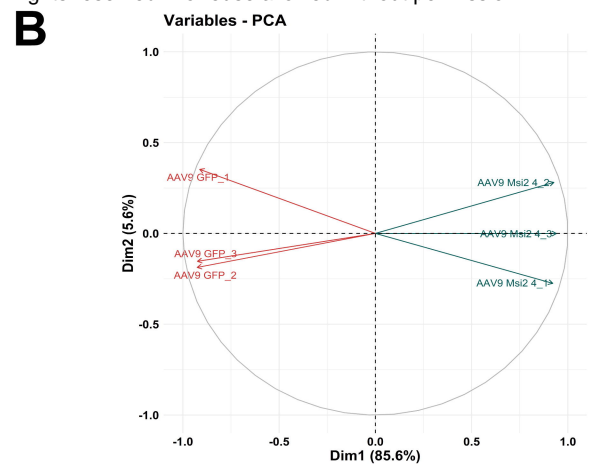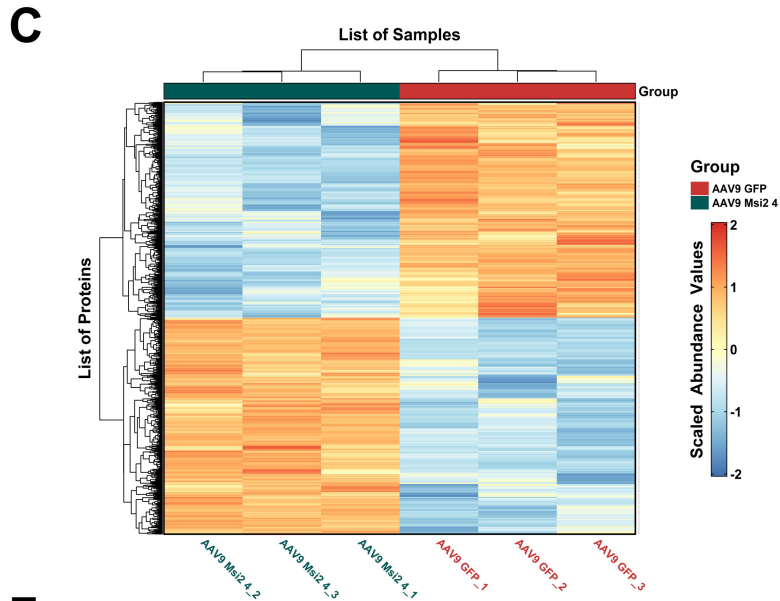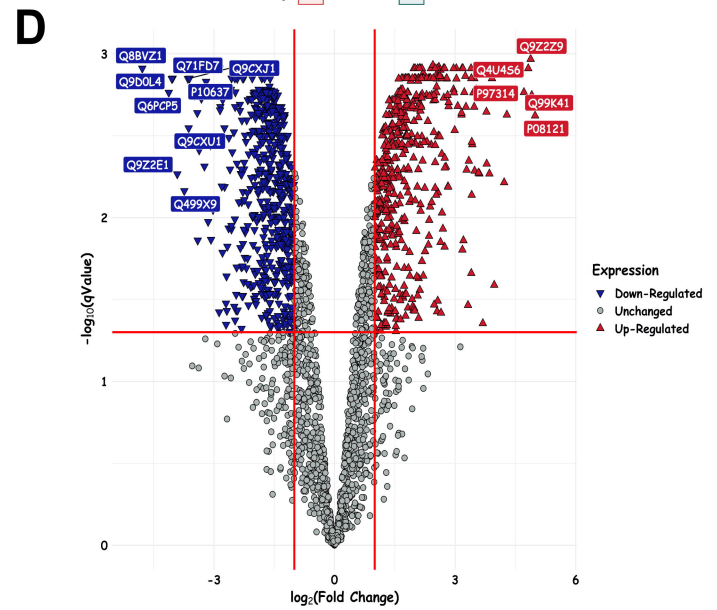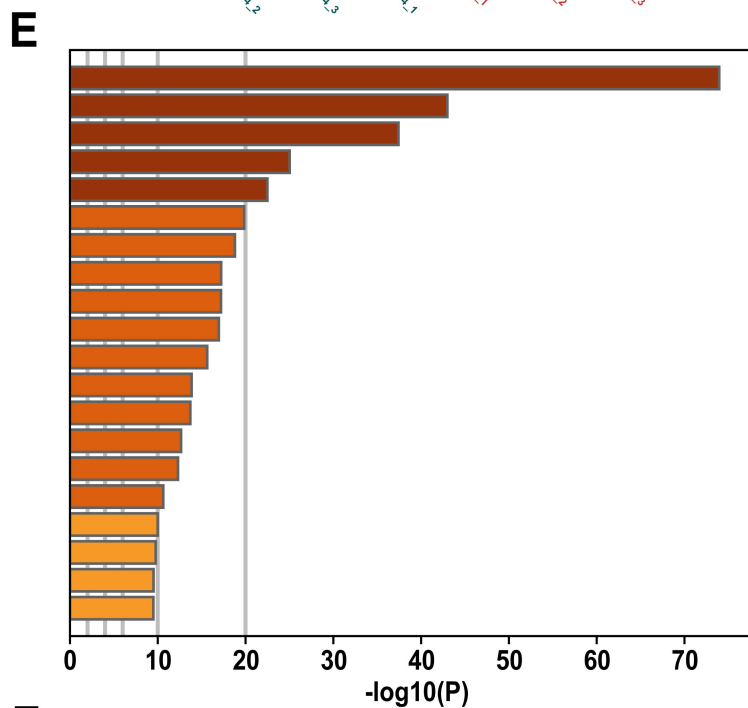

**R-MMU-1428517: The citric acid (TCA) cycle and respiratory electron transport**  
 GO:0043603: cellular amide metabolic process  
**GO:0007005: mitochondrion organization**  
 mmu01200: Carbon metabolism  
 GO:0032787: monocarboxylic acid metabolic process  
 mmu00280: Valine, leucine and isoleucine degradation  
 R-MMU-6798695: Neutrophil degranulation  
 GO:0006790: sulfur compound metabolic process  
 GO:0030029: actin filament-based process  
 mmu00640: Propanoate metabolism  
 WP310: mRNA processing  
 GO:0006979: response to oxidative stress  
 GO:0031032: actomyosin structure organization  
 R-MMU-114608: Platelet degranulation  
**R-MMU-1592230: Mitochondrial biogenesis**  
**mmu04260: Cardiac muscle contraction**  
 R-MMU-5628897: TP53 Regulates Metabolic Genes  
 WP157: Glycolysis and gluconeogenesis  
**R-MMU-77286: mitochondrial fatty acid beta-oxidation of saturated fatty acids**  
 R-MMU-72613: Eukaryotic Translation Initiation

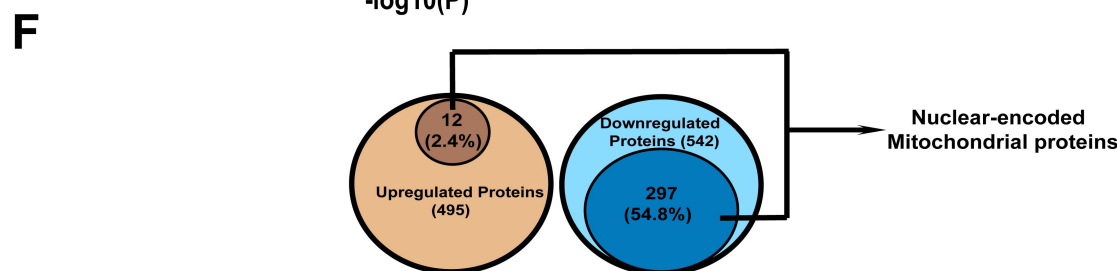

**Fig. 5**

**A**

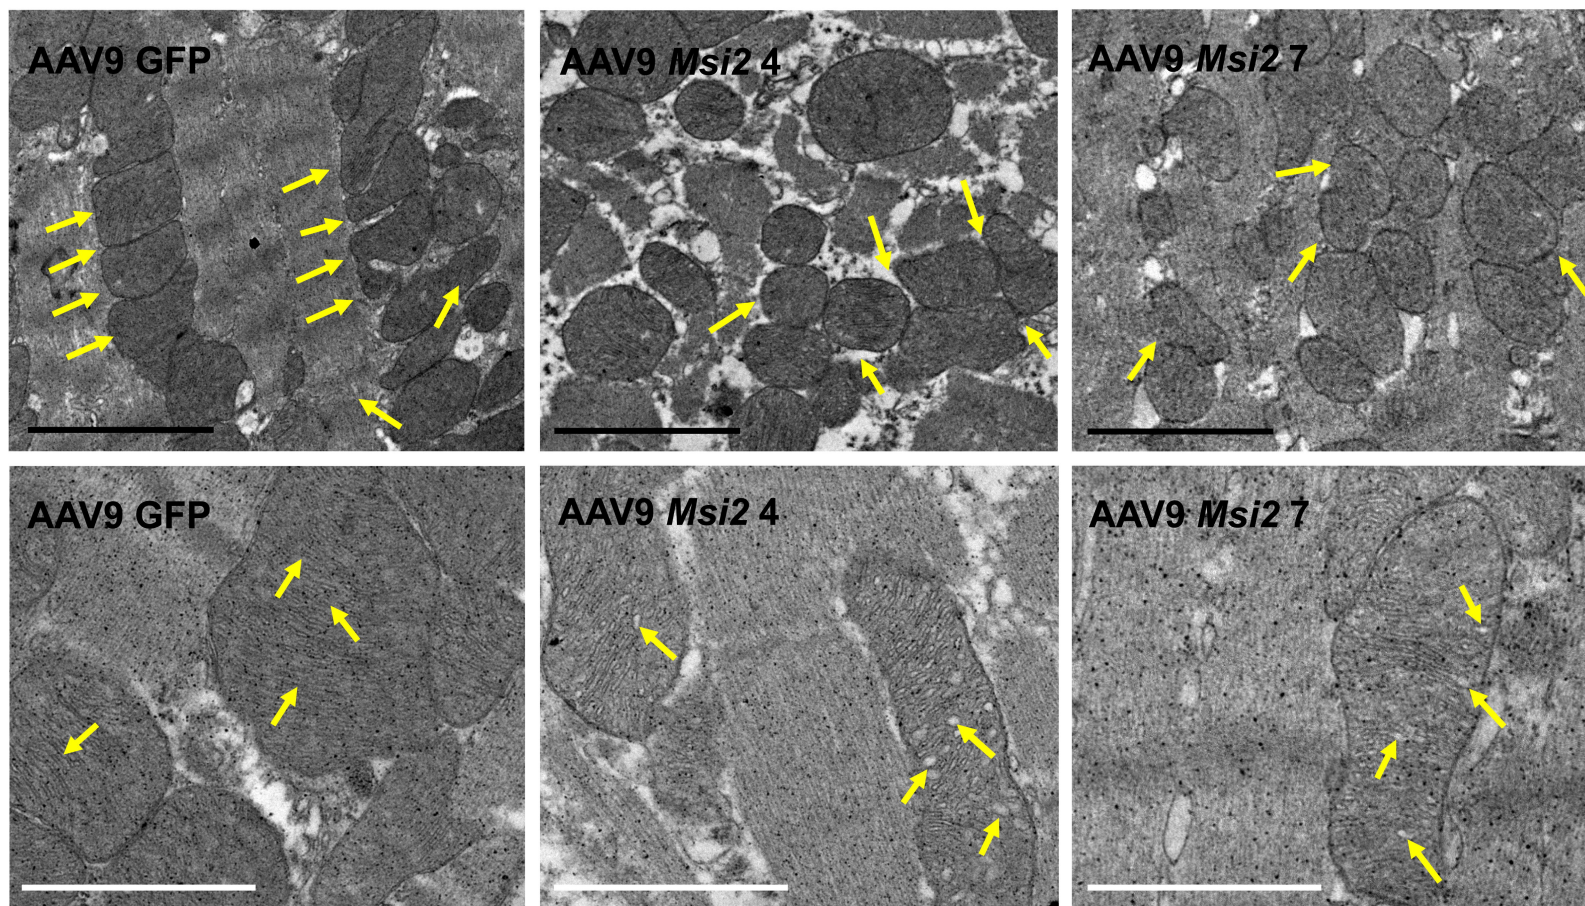

**B**

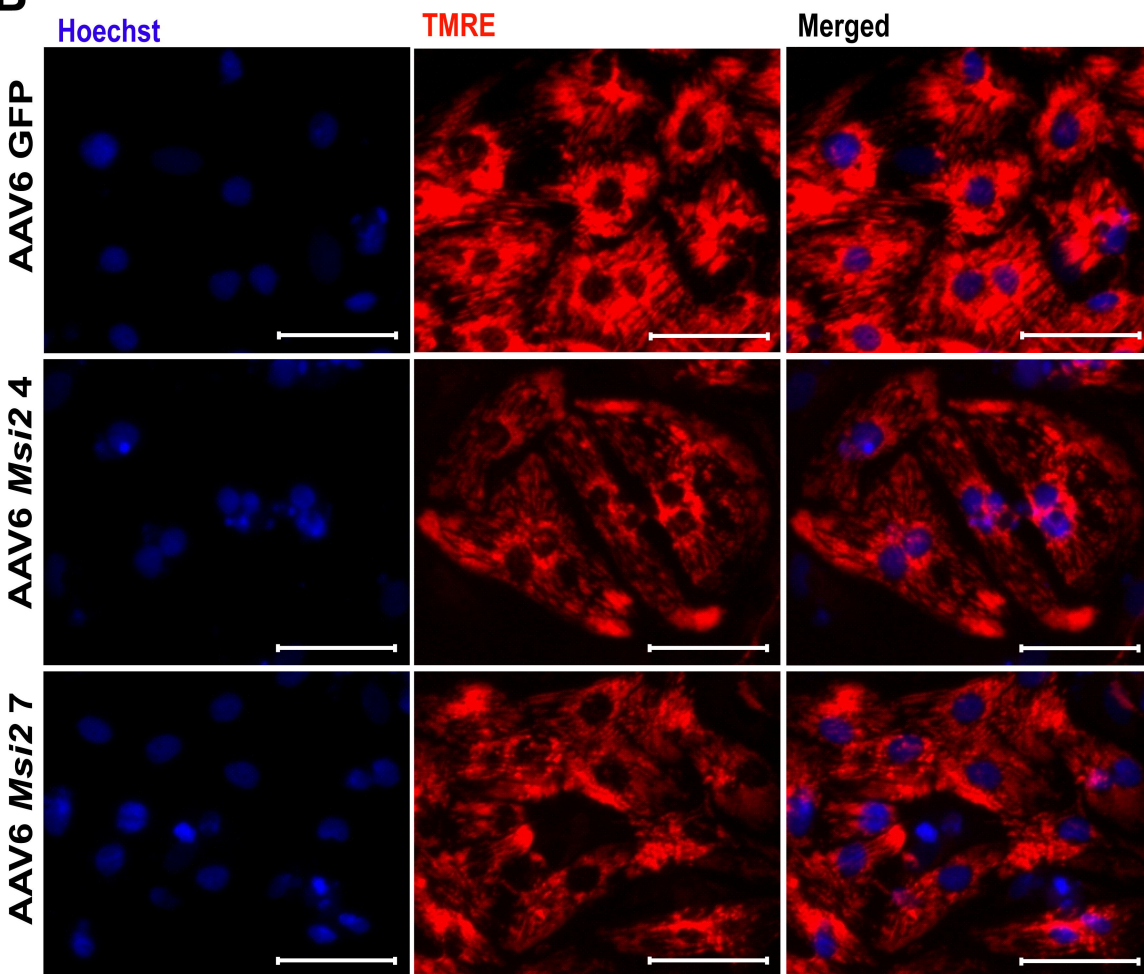

**C**

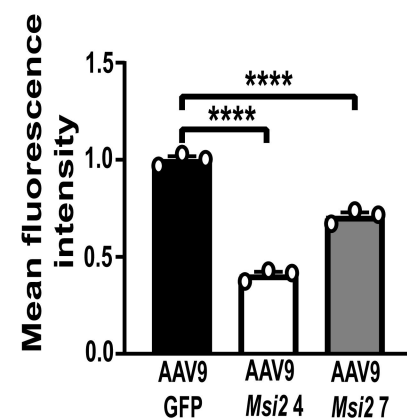

**Fig. 6**

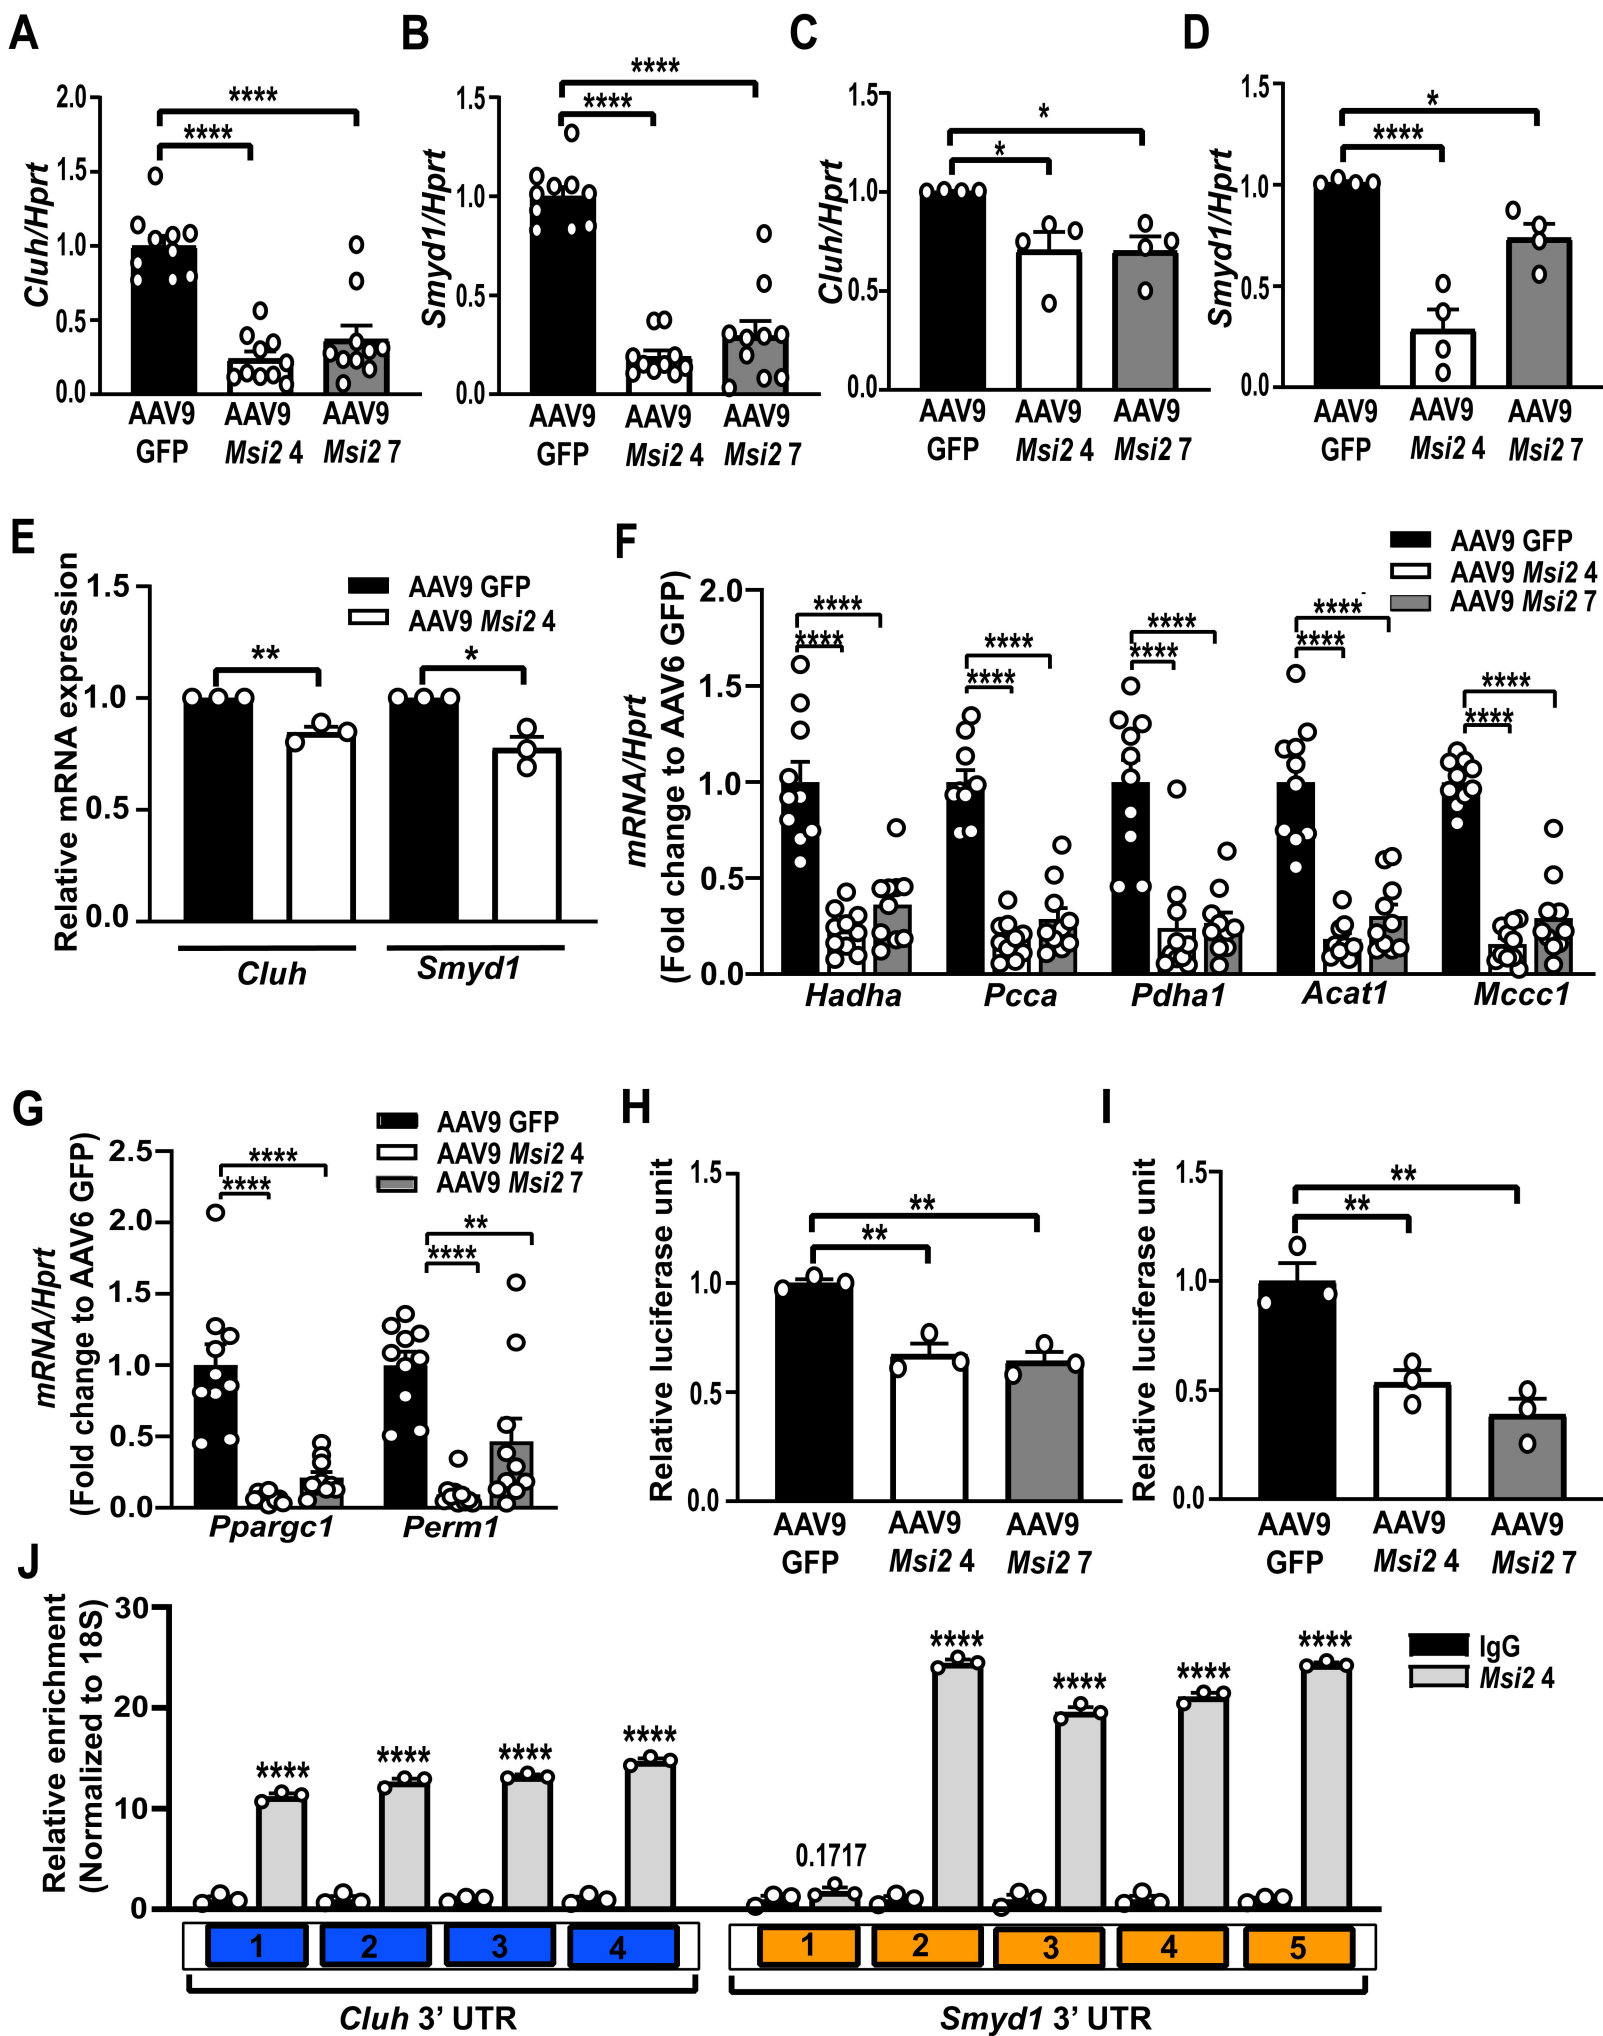

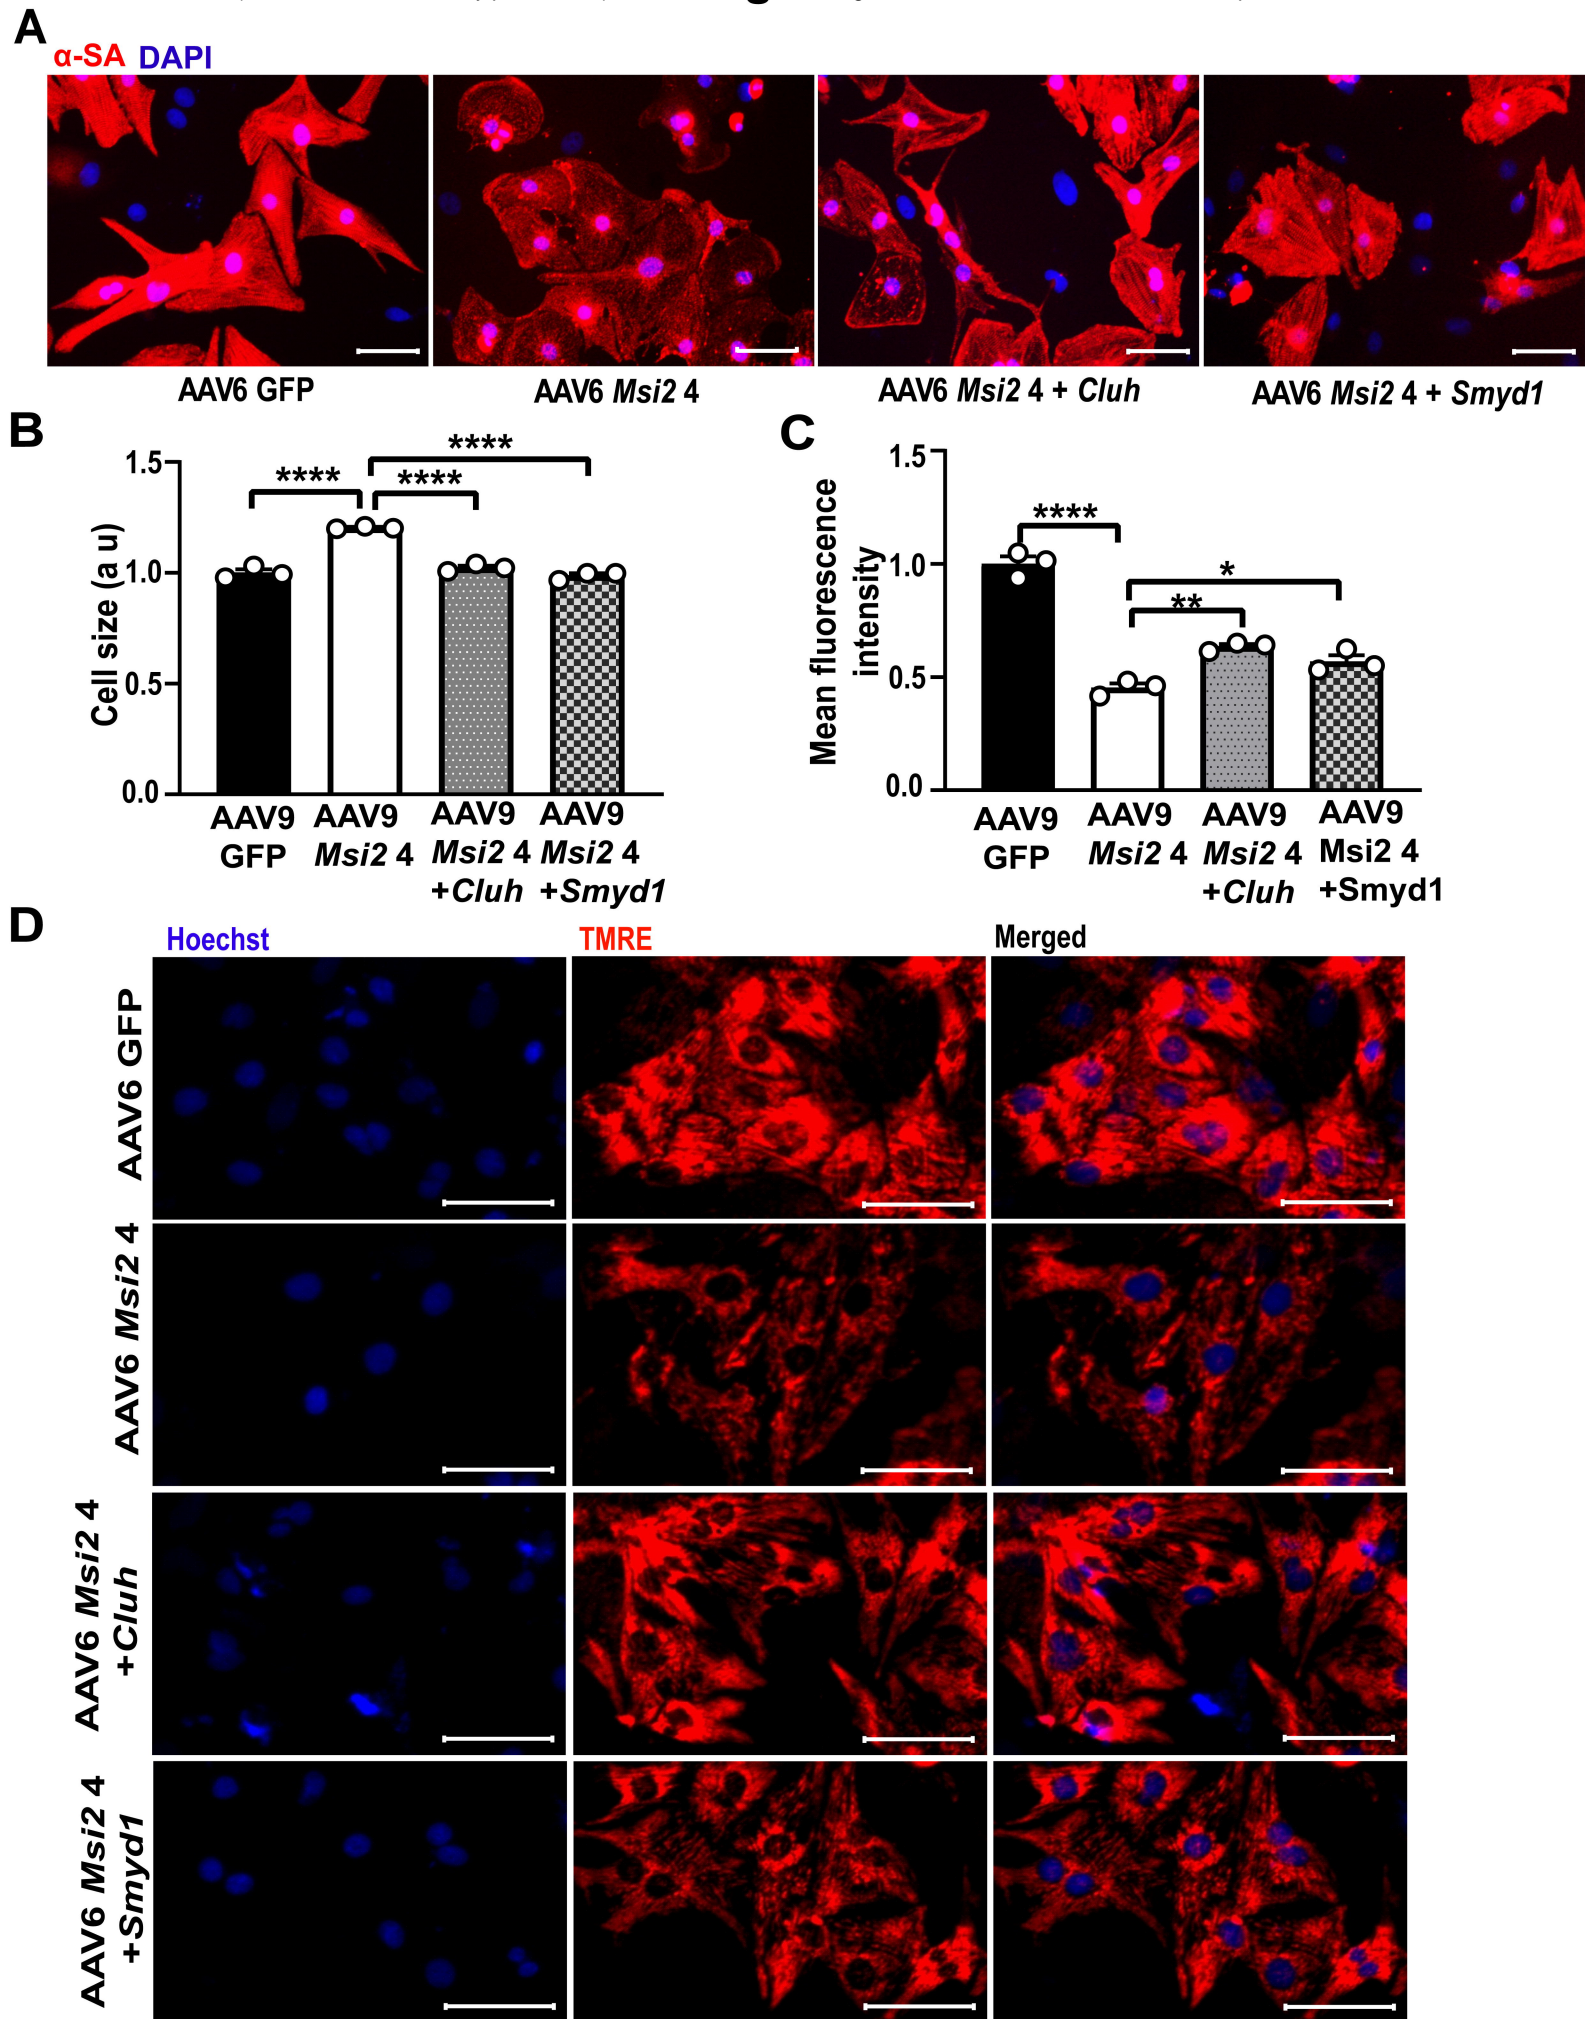

**Fig. 8**

### Normal Heart

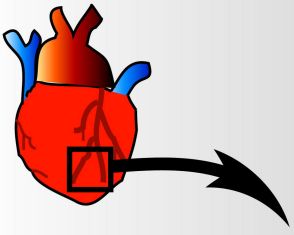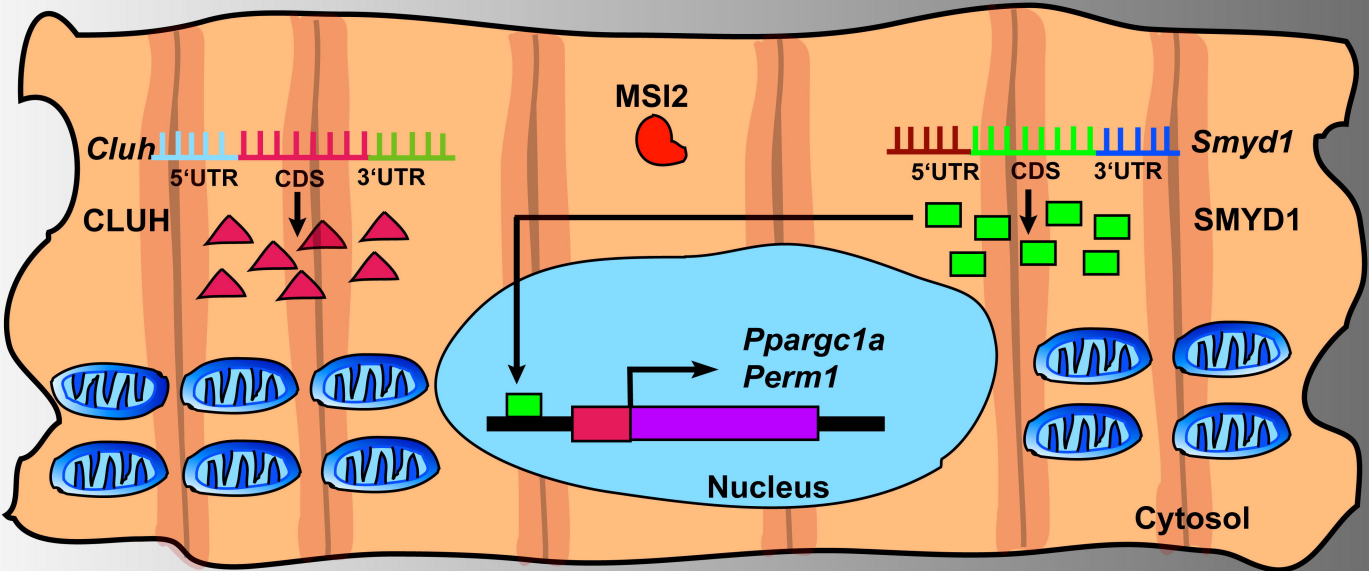

### Hypertrophic Heart

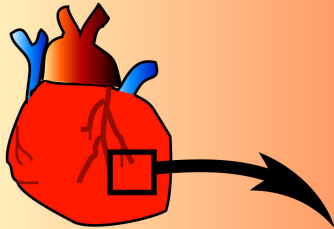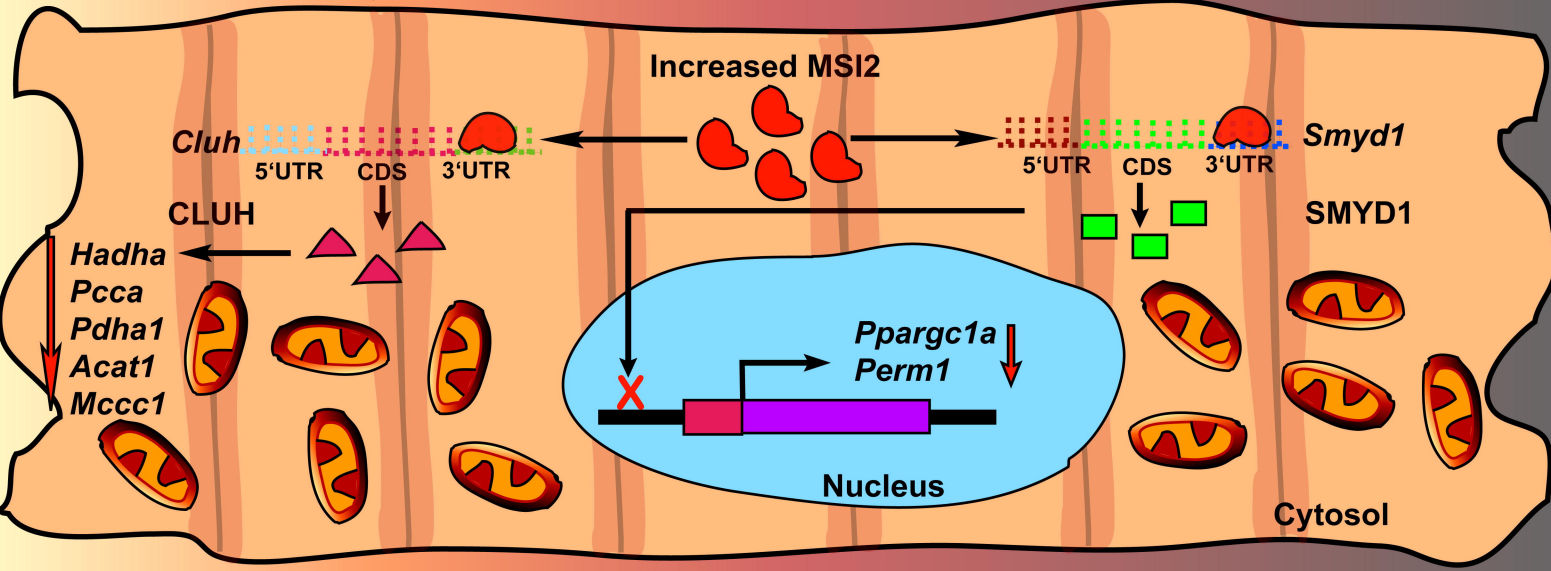

|  |                            |  |      |  |       |
|--|----------------------------|--|------|--|-------|
|  | Healthy Mitochondria       |  | MSI2 |  | SMYD1 |
|  | Dysfunctional Mitochondria |  | CLUH |  |       |
